# Supplementary material for: Automated oxygen administration versus conventional oxygen therapy after major abdominal or thoracic surgery: study protocol for an international multicentre randomised controlled study
Source: PubMed Central journal article supplement — BMJ Open. 2019 Jan 17;9(1):e023833. doi: 10.1136/bmjopen-2018-023833 (PMC6340445; doi:10.1136/bmjopen-2018-023833), 2019-01-17
Supplement: bmjopen-2018-023833.draft_revisions.pdf [file bmjopen-2018-023833.draft_revisions.pdf]

# BMJ Open

BMJ Open is committed to open peer review. As part of this commitment we make the peer review history of every article we publish publicly available.

When an article is published we post the peer reviewers' comments and the authors' responses online. We also post the versions of the paper that were used during peer review. These are the versions that the peer review comments apply to.

The versions of the paper that follow are the versions that were submitted during the peer review process. They are not the versions of record or the final published versions. They should not be cited or distributed as the published version of this manuscript.

BMJ Open is an open access journal and the full, final, typeset and author-corrected version of record of the manuscript is available on our site with no access controls, subscription charges or pay-per-view fees (<http://bmjopen.bmj.com>).

If you have any questions on BMJ Open's open peer review process please email [editorial.bmjopen@bmj.com](mailto:editorial.bmjopen@bmj.com)

# BMJ Open

## Automated oxygen administration vs. conventional oxygen therapy after major abdominal or thoracic surgery: study protocol for an international multicenter randomized controlled study

|                               |                                                                                                                                                                                                                                                                                                                                                                                                                                                                                                                                                                                                                                                                                                                                                                                                                                                                                                        |
|-------------------------------|--------------------------------------------------------------------------------------------------------------------------------------------------------------------------------------------------------------------------------------------------------------------------------------------------------------------------------------------------------------------------------------------------------------------------------------------------------------------------------------------------------------------------------------------------------------------------------------------------------------------------------------------------------------------------------------------------------------------------------------------------------------------------------------------------------------------------------------------------------------------------------------------------------|
| Journal:                      | <i>BMJ Open</i>                                                                                                                                                                                                                                                                                                                                                                                                                                                                                                                                                                                                                                                                                                                                                                                                                                                                                        |
| Manuscript ID                 | bmjopen-2018-023833                                                                                                                                                                                                                                                                                                                                                                                                                                                                                                                                                                                                                                                                                                                                                                                                                                                                                    |
| Article Type:                 | Protocol                                                                                                                                                                                                                                                                                                                                                                                                                                                                                                                                                                                                                                                                                                                                                                                                                                                                                               |
| Date Submitted by the Author: | 25-Apr-2018                                                                                                                                                                                                                                                                                                                                                                                                                                                                                                                                                                                                                                                                                                                                                                                                                                                                                            |
| Complete List of Authors:     | l'her, erwan; CHRU de Brest, Médecine Intensive et Réanimation; Université de Bretagne Occidentale, LATIM INSERM UMR 1101<br>Jaber, S.; Montpellier Univ Hosp, Anesthesia and Critical Care<br>VERZILLI, Daniel; Montpellier Univ Hosp, Anesthesia and Critical Care<br>JACOB, Christophe; CHRU de Brest, Anesthésie<br>HUIBAN, Brigitte; CHRU de Brest, Anesthésie<br>Futier, Emmanuel; University Hospital of Clermont-Ferrand, France, Department of Perioperative Medicine<br>KERFORNE, Thomas; CHU de Poitiers, Anesthésie<br>PATEAU, Victoire; Université de Bretagne Occidentale, LATIM INSERM UMR 1101<br>Bouchard, Pierre-Alexandre; Centre de recherche de l'Institut Universitaire de Cardiologie et de Pneumologie de Québec – Université Laval<br>GOUILLOU, Maellen; CHRU de Brest, CIC INSERM 1412<br>NOWAK, Emmanuel; CHRU de Brest, CIC INSERM 1412<br>Lellouche, Francois; Univ Laval |
| Keywords:                     | oxygen therapy, postoperative complications, Thoracic surgery < SURGERY, abdominal surgery, hypoxemia, hyperoxia                                                                                                                                                                                                                                                                                                                                                                                                                                                                                                                                                                                                                                                                                                                                                                                       |
|                               |                                                                                                                                                                                                                                                                                                                                                                                                                                                                                                                                                                                                                                                                                                                                                                                                                                                                                                        |

SCHOLARONE™  
Manuscripts

1  
2  
3  
4  
5  
6  
7  
8  
9  
10  
11  
12  
13  
14  
15  
16  
17  
18  
19  
20  
21  
22  
23  
24  
25  
26  
27  
28  
29  
30  
31  
32  
33  
34  
35  
36  
37  
38  
39  
40  
41  
42  
43  
44

# Automated oxygen administration vs. conventional oxygen therapy after major abdominal or thoracic surgery: study protocol for an international multicenter randomized controlled study.

Erwan L'HER<sup>1,2</sup>, Samir JABER<sup>3</sup>, Daniel VERZILI<sup>3</sup>, Christophe JACOB<sup>4</sup>, Brigitte HUIBAN<sup>4</sup>, Emmanuel FUTIER<sup>5</sup>, Thomas KERFORNE<sup>6</sup>, Victoire PATEAU<sup>2,7</sup>, Pierre-Alexandre BOUCHARD<sup>8</sup>, Maellen GOUILLOU<sup>9</sup>, Emmanuel NOWAK<sup>9</sup>, François LELLOUCHE<sup>8</sup>

<sup>1</sup>: Medical Intensive Care, CHRU de Brest – La Cavale Blanche, Bvd Tanguy-Prigent, 29609 Brest Cedex, France

<sup>2</sup>: LATIM INSERM UMR 1101, FHU Techsan, Université de Bretagne Occidentale, 29200 Brest, France

<sup>3</sup>: Intensive Care Unit, Department of Anesthesiology B, DAR B CHU de Montpellier, Hôpital Saint Eloi, Université Montpellier 1, France

<sup>4</sup>: Anesthesiology Department, CHRU de Brest – La Cavale Blanche, Bvd Tanguy-Prigent, 29609 Brest Cedex, France

<sup>5</sup>: Anesthesiology Department, Hôpital Estaing, Centre Hospitalier Universitaire Clermont-Ferrand, Clermont-Ferrand, France

<sup>6</sup>: Anesthesiology Department, CHU de Poitiers, Cedex, France

<sup>7</sup>: Oxynov Inc., Technopôle Brest Iroise, 135 rue Claude Chappe, 29280 Plouzané, France

<sup>8</sup>: Centre de recherche de l'Institut de Cardiologie et de Pneumologie de Québec, 2725, chemin Sainte-Foy, Québec (Québec) G1V 4G5, Canada

<sup>9</sup>: Centre d'Investigation Clinique CIC INSERM 1412, CHRU Brest – La Cavale Blanche, Bvd Tanguy-Prigent, 29609 Brest Cedex, France

## **Corresponding Author**

Pr Erwan L'HER  
Médecine Intensive et Réanimation  
CHRU de Brest – La Cavale Blanche  
Bvd Tanguy-Prigent  
29609 BREST Cedex  
France

Email : [Erwan.lher@chu-brest.fr](mailto:Erwan.lher@chu-brest.fr)

Tel : +(33) 298 347 181

**Word Count** : 3800

## ABSTRACT

### Introduction

Hypoxemia and hyperoxia may occur after surgery with potential related complications. The FreeO<sub>2</sub> Post-Op trial is a prospective, multicenter, randomized, controlled trial that evaluates the clinical impact of automated O<sub>2</sub> administration vs. conventional O<sub>2</sub> therapy after major abdominal or thoracic surgeries. The study is powered to demonstrate benefits of automated oxygen titration and weaning in term of oxygenation, which is an important surrogate for complications after such interventions.

### Methods and Analysis

After extubation, patients are randomly assigned to the *Standard* (manual O<sub>2</sub> administration) or *FreeO<sub>2</sub>* group (automated closed-loop O<sub>2</sub> administration). Stratification is performed for the study center and a medical history of COPD. Primary outcome is the percentage of time spent in the target zone of oxygen saturation, during a 3-days time frame. In both groups, patients will benefit from continuous oximetry recordings. The target zone of oxygen saturation is SpO<sub>2</sub> = 88-92% for COPD and 92-96% for non-COPD patients. Secondary outcomes are the nursing workload assessed by the number of manual O<sub>2</sub> flow adjustments, the time spent with severe desaturation (SpO<sub>2</sub> <85%) and hyperoxia area (SpO<sub>2</sub> > 98%), the time spent in a hyperoxia area (SpO<sub>2</sub> > 98%), the oxygen consumption, the duration of oxygen administration during hospitalization, the frequency of use of mechanical ventilation (invasive or noninvasive), the duration of the post-recovery room stay, the hospitalization length of stay and the survival rate.

### Ethics and Dissemination

The Institutional Review Board of the University Hospital of Brest (France) approved the trial for all French centers (IDRCB RB14-060), and the institutional review board from the Québec Heart and Lung Institute (Canada) approved the trial for their own center. The results of the study will be presented at academic conferences and submitted to peer-reviewed journals.

**Trial registration:** [clinicaltrials.gov](https://clinicaltrials.gov) identifier NCT02546830

**Keywords:** oxygen therapy, postoperative complications, thoracic surgery, abdominal surgery, hypoxemia, hyperoxia

1  
2  
3  
4  
5  
6  
7  
8  
9  
10  
11  
12  
13  
14  
15  
16  
17  
18  
19  
20  
21  
22  
23  
24  
25  
26  
27  
28  
29  
30  
31  
32  
33  
34  
35  
36  
37  
38  
39  
40  
41  
42  
43  
44  
45  
46  
47  
48  
49  
50  
51  
52  
53  
54  
55  
56  
57  
58  
59  
60

**Strengths and limitations:** the study is powered to demonstrate benefits of automated oxygen titration and weaning in term of oxygenation in major thoracic and abdominal surgery; our results will not be transposable to other surgery types.

For peer review only

## INTRODUCTION

### Background and Rationale

Current standards for prescribing oxygen recommend providing adequate flows to correct hypoxemia and avoid hyperoxia.[1,2] While deleterious effects of hypoxemia are well known, the potential harmful effects of hyperoxia are underappreciated. Yet, hyperoxia may increase mortality in severe COPD patients [3-5] and may cause cardiac and neurological adverse toxicities in certain situations.[6-8] Precise control of O<sub>2</sub> flows is difficult to achieve in clinical practice and time-consuming.[9]

The FreeO<sub>2</sub> system is an innovative device, developed in collaboration between our researchers from Brest-France, Québec-Canada University Hospitals and Oxynov Inc. a R&D Spin-off from Laval University-Québec. FreeO<sub>2</sub> is a closed-loop device that automates oxygen administration to spontaneously breathing patients, in response to pulse oximetry (SpO<sub>2</sub>) continuous measurements.[10] Automated O<sub>2</sub> administration allows to maintain constant SpO<sub>2</sub> within a pre-determined range using variable O<sub>2</sub> flows, as opposed to manual O<sub>2</sub> administration where the flow is kept constant, with variable SpO<sub>2</sub> values. In preterm infants receiving mechanical ventilation, automated O<sub>2</sub> control results in more time spent within the intended SpO<sub>2</sub> target.[11-13] In a healthy adult model with induced hypoxemia, such a system was more efficient to maintain SpO<sub>2</sub> within the oxygenation target, while ensuring a significant reduction of hypoxemia and hyperoxia periods, as compared to constant O<sub>2</sub> flows.[14] Its efficacy has also been validated in hospitalized COPD patients,[15] or during the early emergency care of patients with acute respiratory distress.[10]

Following major abdominal or thoracic surgery, the risk of hypoxemia may be high while considering patients' clinical status (OSA, restrictive pathologies related to obesity, frequent co-morbidities ...etc...), the type of surgery and anesthesia.[16-21] Hypoxemia may occur either during the immediate postoperative period (they are mainly related to surgery or anesthesia) or may be delayed up to 3-days without clear trigger or underlying pathologies. The potential interest of the FreeO<sub>2</sub> system, using artificial intelligence closed-loop

1  
2  
3 adjustments and predictive analytics, will thus be 1- to perform frequent and rapid O<sub>2</sub>  
4 adjustments in response to oxygenation condition variations (up to each second), or to any  
5 physiological condition changes (movement, speech, eating ...); 2- to enable remote  
6 monitoring and data recording in isolated clinical settings (*i.e.* non-ICU surgical ward), in  
7 order to detect clinical deterioration at a very early stage through integration and fusion of  
8 informations; 3- to avoid maintenance of un-necessary high O<sub>2</sub> flow that may be potentially  
9 deleterious (hypercapnia worsening, coronary and/or cerebral arteries vasoconstriction...).

## 16 **Objectives**

17  
18 The FreeO<sub>2</sub> Post-Op trial aims to evaluate the clinical impact of automated O<sub>2</sub> administration  
19 vs conventional O<sub>2</sub> therapy in terms of oxygenation and hypoxemia prevention after major  
20 abdominal or thoracic surgeries.  
21  
22

## 25 **Trial design**

26  
27 The FreeO<sub>2</sub> PostOp study is an investigator-initiated, prospective, multicenter, randomized,  
28 control, open trial on medical devices comparing two strategies of oxygen therapy following  
29 major surgeries with either standard treatment or automated closed-loop oxygenation.  
30 Patients are randomly assigned to the *Standard* (manual O<sub>2</sub> administration) or *FreeO<sub>2</sub>* group  
31 (automated closed-loop O<sub>2</sub> administration).  
32  
33  
34  
35  
36  
37  
38  
39  
40  
41  
42  
43  
44  
45  
46  
47  
48  
49  
50  
51  
52  
53  
54  
55  
56  
57  
58  
59  
60

## METHODS: PATIENTS, INTERVENTIONS AND OUTCOMES

### Study setting

The FreeO<sub>2</sub> PostOp study is taking place in 5 different university hospitals in France and Canada (Brest, Clermont-Ferrand, Montpellier, Poitiers, Québec). The Institutional Review Board of the University Hospital of Brest (France) approved the trial for all French centers (IDRCB RB14-060). The institutional review board from the Québec Heart and Lung Institute (Canada) approved the trial for their own center. The FreeO<sub>2</sub> Post-Op study is conducted in accordance with the declaration of Helsinki and was registered on September 11, 2015 at <http://www.clinicaltrials.gov> with trial identification number NCT02546830. First patient inclusion was performed on January 14<sup>th</sup> of 2016.

### Eligibility criteria

#### *Inclusion criteria*

To be included, adult patients ( $\geq 18$  years) may be screened for scheduled abdominal or thoracic surgery during the anesthesia consultation and be considered as requiring general anesthesia with an expected duration of two hours or more in the participating centers.

Patients with intermediate to high risk for postoperative pulmonary complications following abdominal surgery with general anesthesia are eligible for participation. To identify such patients, the ARISCAT risk score will be used.[22] An ARISCAT risk score  $\geq 26$  is associated with an intermediate to high risk for postoperative pulmonary complications.

Informed consent is to be signed before the surgery. (Figure 1).

#### *Exclusion criteria*

Patients fulfilling one or more of the following criteria will not be included: life-threatening condition requiring an unplanned emergent surgery, lack of informed consent prior to randomization, non-adult patients (age  $<18$  years), patients with a body mass index  $\geq 35$



1  
2  
3 kg/m<sup>2</sup>, patients with obstructive sleep apnea, and pregnant patients to provide a relatively  
4 homogenous study population and avoid potential confounding factors in the interpretation.  
5  
6  
7

### 8 **Randomization criteria**

9  
10  
11 Patients will be randomized if they fulfill all the following criteria: availability of the FreeO<sub>2</sub>  
12 prototype; absence of criteria of severity justifying the immediate utilization of ventilatory  
13 support (loss of consciousness with a Glasgow Coma Score ≤ 12, serious ventricular rhythm  
14 disorders, hemodynamic instability (SBP <80mmHg or recourse to vasopressors), cardiac or  
15 respiratory arrest, pH < 7.35 and PaCO<sub>2</sub> > 55 mm Hg (if measured), necessity of an O<sub>2</sub> flow  
16 less than 15 L/min to maintain a SpO<sub>2</sub> higher than 92%; no emergent surgery required for an  
17 adverse event; pulse oximetry signal is available.  
18  
19  
20  
21  
22

### 23 **Study intervention**

24  
25 Patients eligible for randomization will be randomly assigned to the *Standard* or *FreeO<sub>2</sub>*  
26 group (Figure 2). The maximal study duration is 3 days. The study was stopped before 3 days  
27 if patient was discharge earlier from hospital or in case of discomfort while keeping nasal  
28 prongs and sensors.  
29  
30  
31  
32

33  
34 Automated O<sub>2</sub> administration is performed using the FreeO<sub>2</sub> system (Oxynov Inc., Québec,  
35 QC, Canada) that is set to maintain SpO<sub>2</sub> between 92-96% for non-COPD patients or between  
36 88-92% for COPD patients. FreeO<sub>2</sub> is equipped with a SpO<sub>2</sub> monitor and an electronically-  
37 controlled valve that automatically adjusts O<sub>2</sub> flows from 0 to 20 L/min on a per second  
38 basis, with a 0.1 L/min precision, according to a closed-loop algorithm in order to reach the  
39 predetermined SpO<sub>2</sub> target.[14] Conventional O<sub>2</sub> is administered using manual flowmeters,  
40 according to standard procedures. All participating units were encouraged to use the same  
41 standardized SpO<sub>2</sub> target as in the automated O<sub>2</sub> administration group, as recommended in  
42 international guidelines.[1,2] In both arms, oxygen can be administered either using nasal  
43 prongs for low flow (O<sub>2</sub> < 6 L/min), or standard face mask in all cases (O<sub>2</sub> = 0-20 L/min).  
44  
45  
46  
47  
48  
49  
50

51 Continuous oximetry recordings are performed in each group during the 3 days of the study,  
52 using the FreeO<sub>2</sub> monitoring system connected to Nonin© 6000 CA flexible adult single-use  
53 digital sensors. Position of the sensors is to be controlled at least every 12-hours. In the  
54 FreeO<sub>2</sub> group, the FreeO<sub>2</sub> will be used both for oxygen administration and for recording. In  
55  
56  
57  
58  
59  
60

1  
2  
3 the Standard group, the FreeO<sub>2</sub> will be used in the recording only and the oxygen  
4 administration will be set manually.  
5  
6  
7

### 8 **Standard procedures**

9  
10 Considering the variety of pathological cases for patients attending the recovery room,  
11 medical treatment, including the other respiratory support, is determined by the attending  
12 physicians based on clinical needs assessment. All other aspects of patient care after  
13 inclusion in the study, including fluid administration, prophylactic antibiotics and  
14 postoperative pain management, are made at clinicians' discretion based on the expertise of  
15 the staff at each center and routine clinical practice.  
16  
17  
18  
19  
20  
21

### 22 **Primary outcome measure**

23  
24 The primary outcome measure will be the percentage of time spent in the target zone of  
25 oxygen saturation, during a 3-days time frame. In both groups (*Standard* and *FreeO<sub>2</sub>*),  
26 patients will be connected to the FreeO<sub>2</sub> system to enable continuous oximetry recordings of  
27 one SpO<sub>2</sub> value per second, either in the recording mode for patients assigned to the  
28 *Standard* group, or in the automated closed-loop mode for patients assigned to the *FreeO<sub>2</sub>*  
29 group.  
30  
31  
32  
33

34 The target zone of oxygen saturation is SpO<sub>2</sub> = 88-92% for COPD and 92-96% for non-COPD  
35 patients.  
36  
37  
38

### 39 **Secondary outcome measures**

40  
41 Several secondary outcome measures will be evaluated during a 3-days time frame : nursing  
42 workload assessed by the number of manual O<sub>2</sub> flow adjustments and airway management  
43 procedures (twice daily assessment); time spent with severe desaturation (SpO<sub>2</sub><85%); time  
44 spent with hyperoxia (SpO<sub>2</sub>> 98%); oxygen consumption measured at the end of  
45 administration;. All data related to oxygenation will be recorded in both groups using the  
46 FreeO<sub>2</sub> device.  
47  
48  
49  
50

51 Other outcome measures will be assessed during a maximal 28-days time frame: duration of  
52 oxygen administration during hospitalization, number of complications related to the  
53  
54  
55  
56  
57  
58  
59  
60

1  
2  
3 administration of oxygen; frequency of use of ventilation (invasive or noninvasive); duration  
4 of hospitalization; survival rate.  
5  
6  
7

## 8 **Participant timeline**

9  
10 Figure 1 shows the Consort diagram of the FreeO<sub>2</sub> PostOp study.  
11  
12

## 13 **Sample size**

14  
15 Based on previous studies and data from the literature, we estimated a 85% time within  
16 oxygenation range with the automated closed-loop oxygen administration system (FreeO<sub>2</sub>)  
17 during the 3 days following surgery and a standard deviation equal or more than 30%. A  
18 total number of 180 patients will be needed to demonstrate a 15% decrease in absolute  
19 difference between the *Standard* and *FreeO<sub>2</sub>* groups (90 patients in each group). The  $\alpha$  risk  
20 is 5% and the  $\beta$  risk is 10% with a bilateral formulation. The expected duration of patient  
21 enrolment will be 3 years.  
22  
23  
24  
25  
26  
27  
28  
29

## 30 **METHODS: ASSIGNMENT OF INTERVENTION**

### 31 **Allocation and sequence generation**

32  
33 A computer-generated randomization is performed in the post-recovery room, within a one-  
34 hour delay after endotracheal extubation. It is performed using random blocks in a 1:1 ratio,  
35 with the use of a centralized web-based management system (Clinfile). Stratification is  
36 performed either according to the study center and a medical history of COPD. After  
37 randomization, treatment is to be initiated within less than one hour.  
38  
39  
40  
41  
42  
43

### 44 **Blinding**

45  
46 Although the individual study assignments of the patients will not be masked, the  
47 coordinating center and all the investigators will remain unaware of the study group  
48 outcomes until the data will be locked.  
49  
50  
51  
52

## 53 **METHODS: DATA COLLECTION, MANAGEMENT AND ANALYSIS**

### 54 **Data collection and management**

55  
56  
57  
58  
59  
60

1  
2  
3 At the time of enrolment, physiological characteristics, coexisting medical conditions,  
4 surgery and anaesthetics characteristics, and oxygen flow rates are recorded. In both groups,  
5 pulse oximetry, respiratory and heart rate, are continuously monitored using a dedicated  
6 software enabling data extraction from the FreeO<sub>2</sub> device. Each hour during the first 3 hours  
7 following randomization and daily during the following 3 days, all standard clinical  
8 parameters are collected. Evolution and clinical outcomes are monitored at Day 28.

9  
10  
11  
12  
13 Data are collected and recorded on an e-CRF by a trained investigator or research assistant  
14 at each centre. A blank copy of the e-CRF can be printed from the e-CRF; this enables the  
15 investigator or research assistant to fill it out with the data of the included patients, which  
16 will thereby be captured. Once data collection has been completed, the investigator or  
17 research assistant shall sign and date the copy. This document will constitute an integral part  
18 of the patient's medical records; as such, it shall be retained permanently. Data recorded in  
19 the e-CRF that originate in source documents must be consistent with each other; if they are  
20 not, the differences have got to be justified and documented.  
21  
22  
23  
24  
25  
26  
27

## 28 **Statistical methods**

29  
30 All the analyses will be performed by the study statistician, in accordance with the  
31 *International Conference on Harmonisation and Good Clinical Practice guidelines*.<sup>[23]</sup> A  
32 predefined statistical analysis plan will be followed. The analysis will be performed on an  
33 intention-to-treat basis after validation by a blind review committee of the inclusion and  
34 exclusion criteria for each patient. All the analyses will be conducted by the biostatistics  
35 department of the *Centre d'Investigation Clinique* from Brest University Hospital (CIC  
36 INSERM 1412) using SAS, V.9.3 statistical software (SAS Institute, Cary, North Carolina, USA).  
37 A two-tailed P value equal or less than 0.05 will be considered as statistically significant.  
38  
39  
40  
41  
42  
43  
44  
45

### 46 ***Descriptive analysis of patient groups at baseline***

47  
48 The continuous variables will be analyzed using standard parameters (median, interquartile  
49 ranges and extreme values, or mean and SD), while indicating the number of missing data.  
50 The category variables will be presented in the form of absolute frequency and percentage,  
51 in each treatment group.  
52  
53  
54  
55  
56  
57  
58  
59  
60

1  
2  
3 The criteria of subject selection will be verified based on the data recorded in the electronic  
4 case reports. Falsely included subjects such as those lost to follow-up will be described.  
5  
6 Deviations from the protocol will be described and analyzed on a case-by-case basis.  
7  
8  
9

### 10 ***Analysis pertaining to the main criteria of evaluation***

11 The percentages of time within the considered SpO<sub>2</sub> range will be compared between the  
12 two groups by means of a variance analysis, according to stratification.  
13  
14  
15

### 16 ***Analysis pertaining to the secondary criteria of evaluation***

17  
18 Secondary criteria of evaluation will be compared between the two treatment groups by  
19 means of the Student's t-test (or the Mann-Whitney U test, if necessary) for continuous  
20 quantitative variables and by means of the X<sup>2</sup> test (or Fisher's exact test) for qualitative  
21 variables and by means of the X<sup>2</sup> test (or Fisher's exact test) for qualitative  
22 variables.  
23  
24  
25  
26  
27

## 28 **METHODS: MONITORING**

### 29 **Data monitoring**

30  
31 Before starting patient enrolment, all physicians and other healthcare workers in the ICU  
32 attend formal training sessions on the study protocol and data collection.  
33  
34

35 An investigator at each center is responsible for daily patient screening, enrolling patients in  
36 the study, ensuring adherence to the protocol and completing the e-CRF. Research assistants  
37 regularly monitor all the centers on site to check adherence to the protocol and the accuracy  
38 of the data recorded.  
39  
40  
41  
42  
43

### 44 **Harms**

45 The investigator is allowed to temporarily, or permanently discontinue the participation of a  
46 patient in the study for any reason that would optimally serve the interests of the subject,  
47 particularly in case of serious adverse events suspected to be associated with the type of  
48 oxygenation method that is used.  
49  
50  
51  
52  
53

### 54 **Auditing**

1  
2  
3 The trial is overseen by a steering committee and an independent safety monitoring board  
4 composed of three independent experts (Jean-Pierre Frat, Christophe Guitton, Alain  
5 Mercat). All centers are monitored by the promotor to check adherence to the protocol, and  
6 accuracy of recorded data. An investigator at each center is responsible for enrolling patients  
7 and ensuring adherence to the protocol. Research assistants at each center are responsible  
8 for patients' follow-up, and for completing the electronic case-report form.  
9  
10  
11  
12  
13  
14

## 15 **ETHICS AND DISSEMINATION**

### 16 **Consent or assent**

17  
18 The patient is included after having provided a written informed consent to the investigator  
19 according to the decision of the central ethics committee. If the patient is not able to  
20 understand the information given, he/she can be included if the same procedure is  
21 completed with a next of kin. After the patient's recovery, he/she will be asked if he/she  
22 agrees to continue the trial.  
23  
24  
25  
26  
27  
28  
29

### 30 **Patient and public involvement**

31  
32 Patients and the public were not involved in the design or conduct of the study. There is no  
33 plan to disseminate the results to study participants.  
34  
35  
36

### 37 **Confidentiality**

38  
39 Data will be handled according to French law. All original records will be archived at trial  
40 sites for 15 years. The clean database file will be anonymized and kept for 15 years.  
41  
42  
43

### 44 **Declaration of interest**

45  
46 The FreeO<sub>2</sub> PostOp study is an investigator-initiated trial funded by the French Ministry of  
47 Health obtained in 2014 from a regional hospital clinical research programme (*Programme*  
48 *Hospitalier de Recherche Clinique Interrégional HUGO 2014*). A scientific committee including  
49 ELH, FL, and EN conceived, drafted and wrote the project. All other authors of the current  
50 manuscript are the investigators in the different centers. The study is promoted by the  
51 University Hospital of Brest.  
52  
53  
54  
55  
56  
57  
58  
59  
60

1  
2  
3 ELH and FL are the inventors of the FreeO<sub>2</sub> device and founded Oxynov Inc. to develop the  
4 commercial device. The firm Oxynov Inc. provides the automated oxygen therapy equipment  
5 to all the participating centers but has no other involvement in the study.  
6  
7  
8

### 9 10 **Access to data**

11 All investigators will have access to the final data set. Participant-level data sets will be made  
12 accessible on a controlled access basis.  
13  
14  
15

### 16 17 **Dissemination policy**

18 Findings will be published in peer-reviewed journals and presented at local, national and  
19 international meetings and conferences to publicize and explain the research to clinicians,  
20 commissioners and service users.  
21  
22  
23  
24  
25  
26  
27

## 28 **DISCUSSION**

29  
30 In postoperative patients, pulmonary function is markedly altered both by general  
31 anesthesia, mechanical ventilation and surgery. Postoperative respiratory complications  
32 following surgery are the second most frequent complications after surgery [19] and  
33 considered as a major cause of morbidity and mortality. [17,24,25] The FreeO<sub>2</sub> PostOp trial is  
34 the first clinical evaluation of automated oxygen titration in patients undergoing major  
35 abdominal or thoracic surgeries. The objectives of the study are to compare the oxygenation  
36 parameters (time in the oxygenation target, time with hypoxemia and with hyperoxia) with  
37 usual oxygen therapy and automated oxygen titration and weaning.  
38  
39  
40  
41  
42  
43  
44

### 45 46 ***Risk and consequences of hypoxemia***

47 There is a good level of evidence and good acceptance by the medical community that  
48 hypoxemia is harmful,[26] especially in adult patients with myocardial ischemia,[27] neuro-  
49 trauma.[28] Data also suggests that even short periods of hypoxemia may promote  
50 significant negative hemodynamic effects.[29] In an animal model, right ventricular dilation  
51 was observed with only 2 hours of daily hypoxemia.[30]  
52  
53  
54  
55  
56  
57  
58  
59  
60

1  
2  
3 During the postoperative period, the occurrence of marked oxygen desaturation related to  
4 periodic apnea and hypoventilation for several hours has been recognized for a long  
5 time,[31,32] with potentially severe consequences such as myocardial ischemia.[33] The  
6 incidence of hypoxemia is high in the recovery room (10-50%),[20] and up to 50% of  
7 postoperative patients will demonstrate episodic hypoxemia in the absence of O<sub>2</sub> therapy.  
8 [34,35] It has also been shown that desaturation episodes are more frequent on the first  
9 night after surgery, but may also worsened 3-5 days postoperatively, especially in patients  
10 with obstructive sleep apnea.[36-38]

11 Pathophysiology of these O<sub>2</sub> desaturations is complex but may be due either to the patient's  
12 condition itself (advanced age, COPD, diabetes, obesity...), respiratory mechanics  
13 modifications (reduction of functional residual capacity, atelectasis, thoracoabdominal  
14 compliance decrease), but also to the use of pharmaceutical agents that are given during  
15 surgery (anesthetics and neuromuscular blocking drugs), or those that are given to relief  
16 postoperative pain (opioids and sedatives).[32]

17  
18  
19  
20  
21  
22  
23  
24  
25  
26  
27  
28  
29 Our hypothesis is that desaturations will be reduced with the automated oxygen titration  
30 (FreeO<sub>2</sub> group), as the oxygen flow is titrated every second and that desaturations will  
31 immediately lead to increasing of oxygen flowrate. In previous studies comparing manual  
32 and automated oxygen administration, it was demonstrated that time with hypoxemia was  
33 reduced with FreeO<sub>2</sub>. [10,15] However, no data are available during the postoperative care.  
34  
35  
36  
37

### 38 39 ***Automated weaning of oxygen***

40  
41  
42  
43  
44  
45  
46  
47  
48  
49  
50  
51  
52  
53  
54  
55  
56  
57  
58  
59  
60  
Oxygen supplementation has initially been promoted to decrease postoperative hypoxemia,  
even if it is also known that it will not have any effect on the overall number of central or  
obstructive apnea, neither atelectasis.[31] Not all patients will benefit from systematic O<sub>2</sub>  
administration,[39] but probably only specific patients with a high-risk profile, especially  
those following long duration and major thoracic or abdominal surgery.[40-42] Moreover,  
standard continuous O<sub>2</sub> therapy tends to reduce but not abolish the occurrence of  
desaturation,[34] given the fact that only point checks are made to adjust O<sub>2</sub> flow to actual  
patients' needs.

It has also been demonstrated that the duration of O<sub>2</sub> therapy was an independent risk  
factor for developing postoperative respiratory complications. Patients who require O<sub>2</sub> for



1  
2  
3 ≥75% of recovery room time (or greater than 90 min) appear to be at greater risk of  
4 developing respiratory complications.[43] This fact may suggest that some patients are not  
5 adequately screened for risk factors such as OSA by standard pre-anesthesia testing, and  
6 that a device dedicated to continuous monitoring of O<sub>2</sub> administration (either alarms on  
7 duration and flow variations) may help to detect such high-risk patients. The increased  
8 resource utilization in patients with longer oxygen therapy requirement in the recovery  
9 room likely reflects the increase in occurrence of pulmonary respiratory complications  
10 requiring invasive and non-invasive ventilatory support, especially on the day of surgery.

11  
12 In L'Her et al study, it was shown that the partial or complete oxygen weaning was  
13 significantly increased with automated oxygen titration in comparison with standard oxygen  
14 administration, in patients managed in the emergency department during 3 hours.[10]

15  
16 In the specific setting of post-operative patients, the reduction of the weaning time may  
17 improve the efficiency of the turn-over of the patients in the recovery room.  
18  
19  
20  
21  
22  
23  
24  
25  
26

### 27 ***Risk and consequences of hyperoxemia***

28  
29 Few studies have promoted the utilization of hyperoxia during and after colo-rectal surgery  
30 to reduce wound infection [44] but this is not recommended in routine, given controversial  
31 data.[45-47] In a post-hoc analysis of the PROXI trial, the authors even pointed out the  
32 potential risks of acute coronary syndromes associated with perioperative hyperoxia.[48]  
33 The pathophysiological risks associated with hyperoxia are described for a long time,  
34 especially in COPD patients.[4] The first recommendation to adjust oxygen flow rates in  
35 order to reduce the risks of hyperoxia was published in the early 60's,[49] and several more  
36 recent guidelines have reiterated similar recommendations.[1,2] The recent demonstration  
37 in a large randomized controlled trial of an increased mortality for ICU patients assigned to a  
38 standard O<sub>2</sub> therapy practice, as compared to a more conservative one (absolute risk  
39 reduction 0.086 [95% CI, 0.017-0.150]; p=0.01) has revived the debate about potential harm  
40 of excessive oxygen therapy in an unselected patients' population.[50] Adverse effects of  
41 hyperoxia could be mediated through a higher oxidative stress, but also increased coronary  
42 [6,7] and cerebral arteries resistances,[8] all being associated with a potential clinical  
43 impact.[51,52] Such potential adverse events related to hyperoxia clearly mandates  
44 attention in avoiding unnecessary O<sub>2</sub> administration. It was demonstrated in two  
45 randomized trials from our team,[10,15] that time with hyperoxia could be reduced with  
46  
47  
48  
49  
50  
51  
52  
53  
54  
55  
56  
57  
58  
59  
60

1  
2  
3 automated oxygen titration, and the hypothesis of the present study is that this problem will  
4 also be reduced after thoracic or abdominal surgeries.  
5  
6  
7  
8

### 9 10 ***Clinical data with automated oxygen titration***

11 Several systems have been developed to titrate oxygen flow rate in neonates and in adult  
12 patients.[10,14] In a previous RCT on adult patients admitted to the ED for acute hypoxemic  
13 respiratory failure, the use of automated O<sub>2</sub> administration was found superior to manual O<sub>2</sub>  
14 administration to improve the time spent within oxygenation targets, with a between-group  
15 difference of 29%,[10] as already observed in other studies on O<sub>2</sub> automated  
16 administration.[53,54] In L'Her et al study, patients experienced less time with hypoxemia  
17 and hyperoxia in the FreeO<sub>2</sub> group.[10] When receiving automated oxygen, partial or  
18 complete oxygen weaning was more frequent during initial care, as compared to standard  
19 manual O<sub>2</sub> administration.  
20  
21  
22  
23  
24  
25  
26

27  
28 As automated closed-loop O<sub>2</sub> administration is not the standard of care for postoperative  
29 patients, we did not design this study as a non-inferiority study but rather as a superiority  
30 study. One limitation of the study is that investigators are aware of the inclusion group, and  
31 blinding is difficult in studies with respiratory support. However, given the characteristics of  
32 the two strategies under evaluation, a double-blind trial was not possible. Second, the  
33 assessment of the oxygenation status could be considered as more precise by analyzing  
34 blood gas sample rather than SpO<sub>2</sub>. However, this would not enable continuous oxygenation  
35 monitoring up to 3-days. Moreover, only continuous of non-averaged SpO<sub>2</sub> values do enable  
36 precise and rapid adjustments of the O<sub>2</sub> flow, in response to exact patients' needs.  
37  
38

39 Noteworthy, all patients in both groups will be continuously monitored using the same  
40 oximeter, which may represent a strength of this study; therefore, the FreeO<sub>2</sub> PostOp will  
41 also represent the largest prospective study comparing two oxygenation strategies over such  
42 a period in the postoperative setting.  
43  
44  
45  
46  
47  
48  
49  
50

51  
52 In conclusion, the FreeO<sub>2</sub> PostOp trial is a pragmatic RCT designed to test the hypothesis that  
53 automated closed-loop O<sub>2</sub> administration is superior to standard manual O<sub>2</sub> administration,  
54 during the postoperative care of patients with major abdominal or thoracic surgery. To the  
55  
56  
57  
58  
59

1  
2  
3  
4  
5  
6  
7  
8  
9  
10  
11  
12  
13  
14  
15  
16  
17  
18  
19  
20  
21  
22  
23  
24  
25  
26  
27  
28  
29  
30  
31  
32  
33  
34  
35  
36  
37  
38  
39  
40  
41  
42  
43  
44  
45  
46  
47  
48  
49  
50  
51  
52  
53  
54  
55  
56  
57  
58  
59  
60

best of our knowledge, the FreeO<sub>2</sub> PostOp trial is the first to evaluate the usefulness of automated closed-loop O<sub>2</sub> administration after extubation in such an indication.

For peer review only

## REFERENCES

- 1- O'Driscoll BR, Howard LS, Earis J, et al. BTS guidelines for oxygen use in adults in healthcare and emergency settings. *Thorax* 2017; 72: i1-i90.
- 2- GOLD Scientific Committee. Global strategy for the diagnosis, management, and prevention of chronic obstructive pulmonary disease 2016. <http://goldcopd.org/global-strategy-diagnosis-management-prevention-copd-2016>  
Date last accessed: March 30, 2018.
- 3- Abdo WF, Heunks LMA. Oxygen-induced hypercapnia in COPD: myths and facts. *Crit Care* 2012; 16: 323.
- 4- Aubier M, Murciano D, Miloc-Emili J et al. Effects of the administration of O<sub>2</sub> on ventilation and blood gases in patients with chronic obstructive pulmonary disease during acute respiratory failure. *Am Rev Respir Dis* 1980; 122: 747-754.
- 5- Austin MA, Wills KE, Blizzard L et al. Effect of high flow oxygen on mortality in chronic obstructive pulmonary disease patients in prehospital setting: randomized controlled trial. *BMJ* 2010; 341: c5642.
- 6- Wijesinghe M, Perrin K, Ranchord A, et al. Routine use of oxygen in the treatment of myocardial infarction: systematic review. *Heart* 2009; 95: 198-202.
- 7- Farquhar H, Weatherall M, Wijesinghe M, et al. Systematic review of studies of the effect of hyperoxia on coronary blood flow. *Am Heart J* 2009; 158: 371-317.
- 8- Floyd TF, Clark JM, Gelfand R, et al. Independent cerebral vasoconstrictive effects of hyperoxia and accompanying arterial hypocapnia at 1 ATA. *J Appl Physiol* 2003; 95: 2453-2461.

- 1  
2  
3 9- Mok W, Wang W, Cooper S, et al. Attitudes towards vital signs monitoring in the  
4  
5 detection of clinical deterioration: scale development and survey ward nurses. *Int J*  
6  
7 *Qual Health Care* 2015; 27: 207-213.  
8  
9  
10 10- L'Her E, Dias P, Gouillou M, et al. Automatic versus manual oxygen administration in  
11  
12 the emergency department. *Eur Respir J* 2017; 50: 1602552.  
13  
14 11- Claire N, Gerhardt T, Everett R, et al. Closed-loop controlled inspired oxygen  
15  
16 concentration for mechanically ventilated very low birth weight infants with frequent  
17  
18 episodes of hypoxemia. *Pediatrics* 2001; 107: 1120-1124.  
19  
20  
21 12- Claire N, Bancalari E, D'Ugard C, et al. Multicenter crossover study of automated  
22  
23 controlled of inspired oxygen in ventilated preterm infants. *Pediatrics* 2011; 127: e76-  
24  
25 e83.  
26  
27  
28 13- Hallenberger A, Poets CF, Hom W, et al. Closed-loop automatic oxygen control (CLAC)  
29  
30 in preterm infants: a randomized controlled trial. *Pediatrics* 2014; 133: e379-e385.  
31  
32  
33 14- Lellouche F, L'Her E. Automated oxygen flow titration to maintain constant  
34  
35 oxygenation. *Respir Care* 2012; 57: 1254-1262.  
36  
37  
38 15- Lellouche F, Bouchard PA, Roberge M, et al. Automated oxygen titration and weaning  
39  
40 with FreeO2 in patients with acute exacerbation of COPD: a pilot randomized trial. *Int*  
41  
42 *J Chron Obstruct Pulmon Dis* 2016; 11: 1983-1990.  
43  
44  
45 16- Weiser TG, Regenbogen SE, Thompson KD, et al. An estimation of the global volume  
46  
47 of surgery: a modeling strategy based on available data. *Lancet* 2008; 372: 139-144.  
48  
49  
50 17- Khuri SF, Henderson WG, DePalma RG, et al. Determinants of long-term survival after  
51  
52 major surgery and the adverse effect of postoperative complications. *Ann Surg* 2005;  
53  
54 242: 326-341.  
55  
56  
57  
58  
59  
60

- 1  
2  
3 18-Shander A, Fleisher LA, Barie PS, et al. Clinical and economic burden of postoperative  
4 complications: patient safety summit on definition, risk-reducing interventions, and  
5 preventive strategies. Crit Care Med 2011; 39: 2163-2172.  
6  
7  
8  
9  
10 19-Arozullah AM, Daley J, Henderson WG, et al. Multifactorial risk index for predicting  
11 postoperative respiratory failure in men after major noncardiac surgery. The National  
12 Veterans Administration Surgical Quality Improvement Program. Ann Surg 2000; 232:  
13 242-253.  
14  
15  
16  
17  
18 20-Lawrence VA, Dhanda R, Hilsenbeck SG, et al. Risk of pulmonary complications after  
19 elective abdominal surgery. Chest 1996; 110: 744-750.  
20  
21  
22  
23 21-Lindberg P, Gunnarsson L, Tokics L, et al. Atelectasis and lung function in the  
24 postoperative period. Acta Anaesthesiol Scand 1992; 36: 546-553.  
25  
26  
27  
28 22-Mazo V, Sabaté S, Canet J, et al. Prospective external validation of a predictive score  
29 for postoperative pulmonary complications. Anesthesiology 2014; 121: 219-231.  
30  
31  
32  
33 23-International council for harmonization of technical requirements for  
34 pharmaceuticals for human use. Guidelines for good clinical practice – R2 November  
35 2016.  
36  
37  
38  
39 [http://www.ich.org/fileadmin/Public\\_Web\\_Site/ICH\\_Products/Guidelines/Efficacy/E](http://www.ich.org/fileadmin/Public_Web_Site/ICH_Products/Guidelines/Efficacy/E6/E6_R2_Step_4_2016_1109.pdf)  
40 [6/E6 R2 Step 4 2016 1109.pdf](http://www.ich.org/fileadmin/Public_Web_Site/ICH_Products/Guidelines/Efficacy/E6/E6_R2_Step_4_2016_1109.pdf) Date last accessed: March 30, 2018.  
41  
42  
43  
44 24-Karcz M, Papadakos PJ. Respiratory complications in the postanesthesia care unit: a  
45 review of pathophysiological mechanisms. Can J Respir Ther 2013; 49: 21-29.  
46  
47  
48  
49 25-Serpa Neto A, Hemmes SN, Barbas CS, et al. Incidence of mortality and morbidity  
50 related to postoperative lung injury in patients who have undergone abdominal or  
51 thoracic surgery: a systematic review and meta-analysis. Lancet respir med 2014; 2:  
52 1007-1015.  
53  
54  
55  
56  
57  
58  
59  
60

- 1  
2  
3 26-Bateman NT, Leach RM. ABC of oxygen. Acute oxygen therapy. *BMJ* 1998; 317: 798-  
4  
5 801.  
6  
7 27-Galatius-Jensen S, Hansen J, Rasmussen V, et al. Nocturnal hypoxaemia after  
8  
9 myocardial infarction: association with nocturnal myocardial ischaemia and  
10  
11 arrhythmias. *Br Heart J* 1994; 72: 23-30.  
12  
13  
14 28-DeWitt DS, Prough DS. Blast-induced brain injury and posttraumatic hypotension and  
15  
16 hypoxemia. *J Neurotrauma* 2009; 26: 877-887.  
17  
18  
19 29-Selinger SR, Kennedy TP, Buescher P, et al. Effects of removing oxygen from patients  
20  
21 with chronic obstructive disease. *Am Rev Respir Dis* 1987; 136: 85-91.  
22  
23  
24 30-Nattie EE, Doble EA. Threshold of intermittent hypoxia-induced right ventricular  
25  
26 hypertrophy in the rat. *Respir Physiol* 1984; 56: 253-259.  
27  
28  
29 31-Jones JG, Jordan C, Scudder C, et al. Episodic postoperative oxygen desaturation: the  
30  
31 value of added oxygen. *J R Soc Med* 1985; 78: 1019-1022.  
32  
33  
34 32-Catley DM, Thornton C, Jordan C, et al. Pronounced, episodic oxygen desaturation in  
35  
36 the postoperative period: its association with ventilatory pattern and analgesic  
37  
38 regimen. *Anesthesiology* 1985; 63: 20-28.  
39  
40  
41 33-Gögenur I, Rosenberg-Adamsen S, Lie C, et al. relationship between nocturnal  
42  
43 hypoxaemia, tachycardia and myocardial ischaemia after major abdominal surgery.  
44  
45 *Br J Anaesth* 2004; 93: 333-338.  
46  
47  
48 34-Canet J, Ricos M, Vidal F. Early postoperative arterial oxygen desaturation.  
49  
50 Determining factors and response to oxygen therapy. *Anesth Analg* 1989; 69: 207-  
51  
52 212.  
53  
54  
55  
56  
57  
58  
59  
60

- 1  
2  
3 35-Ramanchandran SK, Nafiu OO, Ghaferi A, et al. Independent predictors and outcomes  
4  
5 of unanticipated early postoperative tracheal intubation after nonemergent,  
6  
7 noncardiac surgery. *Anesthesiology* 2011; 115: 44-53.  
8  
9  
10 36-Gögenur I, Wildschiotz G, Rosenberg J. Circadian distribution of sleep phases after  
11  
12 major abdominal surgery. *Br J Anaesth* 2008; 100: 45-49.  
13  
14 37-Chung F, Liao P, Elsaid H, et al. Factors associated with postoperative exacerbation of  
15  
16 sleep-disordered breathing. *Anesthesiology* 2014; 120: 299-311.  
17  
18  
19 38-Rosenberg J, Wildschiodtz G, Pedersen MH, et al. Late postoperative nocturnal  
20  
21 episodic hypoxaemia and associated sleep pattern. *Br J Anaesth* 1994; 72: 145-150.  
22  
23 39- Gift AG, Stanik J, Karpenik J, et al. Oxygen saturation in postoperative patients at low  
24  
25 risk for hypoxemia: is oxygen therapy needed? *Anesth Analg* 1995; 80: 368-372.  
26  
27  
28 40-Pedersen T, Viby-Mogensen J, Ringsted C. Anaesthetic practice and postoperative  
29  
30 pulmonary complications. *Acta Anaesthesiol Scand* 1992; 36: 812-818.  
31  
32 41-Mathew JP, Rosenbaum SH, O'Connor T, et al. Emergency tracheal intubation in the  
33  
34 postoperative care unit: physician error or patient disease? *Anesth Analg* 1990; 71:  
35  
36 691-697.  
37  
38  
39 42-Smetana GW, Lawrence VA, Cornell JE, et al. Preoperative pulmonary risk  
40  
41 stratification for noncardiothoracic surgery: systematic review for the American  
42  
43 College of Physicians. *Ann Intern Med* 2006; 144: 581-595.  
44  
45  
46 43-Ramachandran SK, Thompson A, Pandit JJ, et al. Retrospective observational  
47  
48 evaluation of postoperative oxygen saturation levels and associated postoperative  
49  
50 respiratory complications and hospital resource utilization. *PloS one* 2017 ;  
51  
52 12:e0175408.  
53  
54  
55  
56  
57  
58  
59  
60



- 1  
2  
3 44-Greif R, Akça O, Horn EP, et al. Supplemental perioperative oxygen to reduce the  
4  
5 incidence of surgical-wound infection. *N Engl J Med* 2000 ; 342: 161-167.  
6  
7 45-Meyhoff CS, Wetterslev J, Jorgensen LN, et al. Effect of high perioperative oxygen  
8  
9 fraction on surgical site infection and pulmonary complications after abdominal  
10  
11 surgery: the PROXI randomized clinical trial. *JAMA* 2009; 302: 1543-1550.  
12  
13  
14 46-Togioka B, Galvagno S, Sumida S, et al. The role of perioperative high inspired oxygen  
15  
16 therapy in reducing surgical site infection: a meta-analysis. *Anesth Analg* 2012; 114:  
17  
18 334-342.  
19  
20  
21 47-Wetterslev J, Meyhoff CS, Jørgensen LN, et al. The effects of high perioperative  
22  
23 inspiratory oxygen fraction for adult surgical patients. *Cochrane Database Syst Rev*  
24  
25 2015 Jun 25;(6):CD008884.  
26  
27 48-Fonnes S, Gögenur I, Sondergaard ES, et al. Perioperative hyperoxia – Long-term  
28  
29 impact on cardiovascular complications after abdominal surgery, a post-hoc analysis  
30  
31 of the PROXI trial.  
32  
33 49-Campbell EJ. The J. Burns Amberson Lecture. The management of acute respiratory  
34  
35 failure in chronic bronchitis and emphysema. *Am Rev Respir Dis* 1967 ; 96 : 626-639.  
36  
37 50-Girardis M, Busani S, Damiani E, et al. Effect of conservative vs conventional oxygen  
38  
39 therapy on mortality among patients in an intensive care unit : the Oxygen-ICU  
40  
41 randomized clinical trial. *JAMA* 2016; 316 : 1583-1589.  
42  
43 51-Stub D, Smith K, Bernard S, et al. Air versus oxygen in ST-segment-elevation  
44  
45 myocardial infarction. *Circulation* 2015; 131: 2143-2150.  
46  
47 52-Damiani E, Adrario E, Girardis M, et al. Arterial hyperoxia and mortality in critically ill  
48  
49 patients: a systematic review and meta-analysis. *Crit Care* 2014; 18: 711.  
50  
51 53-Cirio S, Nava S. Pilot study of a new device to titrate oxygen flow in hypoxic patients  
52  
53 on long-term oxygen therapy. *Respir Care* 2011; 56: 429-434.  
54  
55 54-Rice KL, Schmidt MF, Buan JS, et al. AccuO2 oximetry-driven oxygen-conserving  
56  
57 device versus fixed-dose oxygen devices in stable COPD patients. *Respir Care* 2011;  
58  
59 56: 1901-1905.  
60

## Footnotes

**Contributors** E-LH and F-L designed this study, drafted the manuscript of the protocol and critically revised the manuscript. E-LH, S-J, D-V, C-J, B-H, E-F, T-K, V-P, PA-B, and F-L participated in the conduct of the study. M-G and E-N participated in the protocol methodological assessment and statistical plan. All authors read and approved the final manuscript.

**Funding** This trial was funded by the French Ministry of Health obtained in 2014 from a regional hospital clinical research programme (*Programme Hospitalier de Recherche Clinique Interrégional HUGO 2014*).

**Disclaimer** The sponsors have no role in the study design and conduct; the collection, management, analysis and interpretation of the data; or the preparation and approval of the manuscript.

**Competing interests** E-LH reports lecture fees and travel expenses for lectures given at academic meetings from GE Healthcare, Sedana Medical, Smiths Medical, Air Liquide Medical Systems. ELH and FL are the inventors of the FreeO<sub>2</sub> device and founded Oxynov Inc. to develop the commercial device. The firm Oxynov Inc. provides the automated oxygen therapy equipment to all the participating centers but has no other involvement in the study.

**Patient consent** Obtained.

**Ethics approval** The Institutional Review Board of the University Hospital of Brest (France) approved the trial for all French centers (IDRCB RB14-060). The institutional review board from the Québec Heart and Lung Institute (Canada) approved the trial for their own center.. Any protocol modification will be submitted for review and approval by the ethics committee. The FreeO<sub>2</sub> Post-Op study is conducted in accordance with the declaration of Helsinki and was registered on September 11, 2015 at <http://www.clinicaltrials.gov> with trial identification number NCT02546830. First patient inclusion was performed on January 14<sup>th</sup> of 2016.

**Provenance and peer review** Not commissioned; externally peer reviewed.

## Article Summary

- Hypoxemia may occur either during the immediate postoperative period, or may be delayed up to 3-days.
- While deleterious effects of hypoxemia are well known, the potential harmful effects of hyperoxia are underappreciated.
- Precise control of O<sub>2</sub> flows is difficult to achieve in clinical practice and time-consuming.
- The FreeO<sub>2</sub> PostOp trial is the first clinical evaluation of automated oxygen titration in patients undergoing major abdominal or thoracic surgeries.
- Strengths and limitations: the study is powered to demonstrate benefits of automated oxygen titration and weaning in term of oxygenation in major thoracic and abdominal surgery; our results will not be transposable to other surgery types.

## Figures Legends

### Figure 1: Study design of the FreeO<sub>2</sub> PostOp study

Inclusion is performed during the anesthesia consultation, prior to a scheduled major surgery ( $\geq$  2-hours duration; ARISCAT score  $\geq$  26). Eligibility criteria are verified and the patient needs to sign the informed consent. Randomization is performed no later than 1-hour following extubation in the recovery room. Clinical data will be recorded each hour during the first 3-hours of care and twice daily for up to 3-days. Continuous SpO<sub>2</sub> recording will be performed in each randomization groups for up to 3-days. Outcome parameters will be assessed at day 28.

*LOS: length-of-stay (days); SpO<sub>2</sub>: pulse oximetry (%).*

### Figure 2: Consort diagram of the FreeO<sub>2</sub> PostOp study

Randomization will be performed after verification of the eligibility criteria and it will be stratified according to the presence of a medical history of COPD. For non-COPD patients the target will be a SpO<sub>2</sub> range = 92-96%; for COPD patients the target will be a SpO<sub>2</sub> range = 88-92%.

Patients will be assigned either to standard continuous O<sub>2</sub> administration (*Standard*: manual adjustment), or automated closed-loop O<sub>2</sub> administration (*FreeO<sub>2</sub>*: automated adjustment, up to each second); in both groups, continuous SpO<sub>2</sub> recordings will be performed during up to 3 days according to the FreeO<sub>2</sub> system.

*SpO<sub>2</sub>: pulse oximetry (%).*

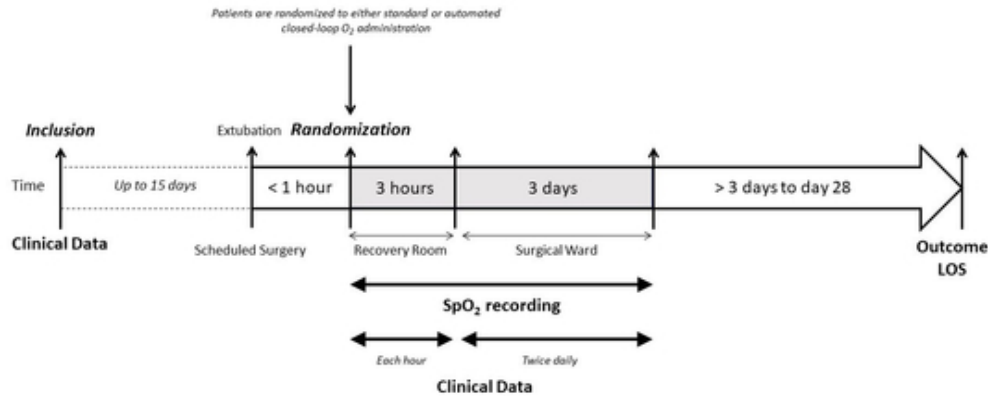

Figure 1: Study design of the FreeO2 PostOp study

Inclusion is performed during the anesthesia consultation, prior to a scheduled major surgery ( $\geq 2$ -hours duration; ARISCAT score  $\geq 26$ ). Eligibility criteria are verified and the patient needs to sign the informed consent. Randomization is performed no later than 1-hour following extubation in the recovery room. Clinical data will be recorded each hour during the first 3-hours of care and twice daily for up to 3-days. Continuous SpO<sub>2</sub> recording will be performed in each randomization groups for up to 3-days. Outcome parameters will be assessed at day 28.

LOS: length-of-stay (days); SpO<sub>2</sub>: pulse oximetry (%).

45x25mm (300 x 300 DPI)

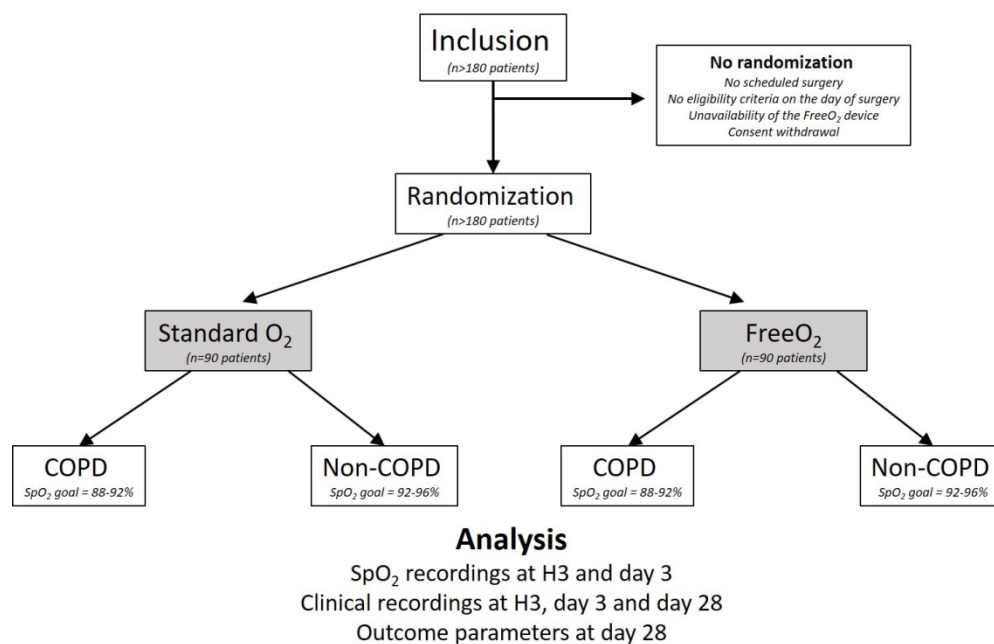

28 Figure 2: Consort diagram of the FreeO2 PostOp study

29 Randomization will be performed after verification of the eligibility criteria and it will be stratified according  
30 to the presence of a medical history of COPD. For non-COPD patients the target will be a SpO<sub>2</sub> range = 92-  
31 96%; for COPD patients the target will be a SpO<sub>2</sub> range = 88-92%.

32 Patients will be assigned either to standard continuous O<sub>2</sub> administration (Standard: manual adjustment), or  
33 automated closed-loop O<sub>2</sub> administration (FreeO<sub>2</sub>: automated adjustment, up to each second); in both  
34 groups, continuous SpO<sub>2</sub> recordings will be performed during up to 3 days according to the FreeO<sub>2</sub> system.  
35 SpO<sub>2</sub>: pulse oximetry (%).

36 128x83mm (300 x 300 DPI)

# BMJ Open

## Automated oxygen administration vs. conventional oxygen therapy after major abdominal or thoracic surgery: study protocol for an international multicenter randomized controlled study

|                                 |                                                                                                                                                                                                                                                                                                                                                                                                                                                                                                                                                                                                                                                                                                                                                                                                                                                                                                        |
|---------------------------------|--------------------------------------------------------------------------------------------------------------------------------------------------------------------------------------------------------------------------------------------------------------------------------------------------------------------------------------------------------------------------------------------------------------------------------------------------------------------------------------------------------------------------------------------------------------------------------------------------------------------------------------------------------------------------------------------------------------------------------------------------------------------------------------------------------------------------------------------------------------------------------------------------------|
| Journal:                        | <i>BMJ Open</i>                                                                                                                                                                                                                                                                                                                                                                                                                                                                                                                                                                                                                                                                                                                                                                                                                                                                                        |
| Manuscript ID                   | bmjopen-2018-023833.R1                                                                                                                                                                                                                                                                                                                                                                                                                                                                                                                                                                                                                                                                                                                                                                                                                                                                                 |
| Article Type:                   | Protocol                                                                                                                                                                                                                                                                                                                                                                                                                                                                                                                                                                                                                                                                                                                                                                                                                                                                                               |
| Date Submitted by the Author:   | 08-Aug-2018                                                                                                                                                                                                                                                                                                                                                                                                                                                                                                                                                                                                                                                                                                                                                                                                                                                                                            |
| Complete List of Authors:       | l'her, erwan; CHRU de Brest, Médecine Intensive et Réanimation; Université de Bretagne Occidentale, LATIM INSERM UMR 1101<br>Jaber, S.; Montpellier Univ Hosp, Anesthesia and Critical Care<br>VERZILLI, Daniel; Montpellier Univ Hosp, Anesthesia and Critical Care<br>JACOB, Christophe; CHRU de Brest, Anesthésie<br>HUIBAN, Brigitte; CHRU de Brest, Anesthésie<br>Futier, Emmanuel; University Hospital of Clermont-Ferrand, France, Department of Perioperative Medicine<br>KERFORNE, Thomas; CHU de Poitiers, Anesthésie<br>PATEAU, Victoire; Université de Bretagne Occidentale, LATIM INSERM UMR 1101<br>Bouchard, Pierre-Alexandre; Centre de recherche de l'Institut Universitaire de Cardiologie et de Pneumologie de Québec – Université Laval<br>GOUILLOU, Maellen; CHRU de Brest, CIC INSERM 1412<br>NOWAK, Emmanuel; CHRU de Brest, CIC INSERM 1412<br>Lellouche, Francois; Univ Laval |
| <b>Primary Subject Heading</b>: | Respiratory medicine                                                                                                                                                                                                                                                                                                                                                                                                                                                                                                                                                                                                                                                                                                                                                                                                                                                                                   |
| Secondary Subject Heading:      | Anaesthesia                                                                                                                                                                                                                                                                                                                                                                                                                                                                                                                                                                                                                                                                                                                                                                                                                                                                                            |
| Keywords:                       | oxygen therapy, postoperative complications, Thoracic surgery < SURGERY, abdominal surgery, hypoxemia, hyperoxia                                                                                                                                                                                                                                                                                                                                                                                                                                                                                                                                                                                                                                                                                                                                                                                       |
|                                 |                                                                                                                                                                                                                                                                                                                                                                                                                                                                                                                                                                                                                                                                                                                                                                                                                                                                                                        |

SCHOLARONE™  
Manuscripts

1  
2  
3  
4  
5  
6  
7  
8  
9  
10  
11  
12  
13  
14  
15  
16  
17  
18  
19  
20  
21  
22  
23  
24  
25  
26  
27  
28  
29  
30  
31  
32  
33  
34  
35  
36  
37  
38  
39  
40  
41  
42  
43  
44  
45  
46  
47  
48  
49  
50  
51  
52  
53  
54  
55  
56  
57  
58  
59  
60

# Automated oxygen administration vs. conventional oxygen therapy after major abdominal or thoracic surgery: study protocol for an international multicenter randomized controlled study.

Erwan L'HER<sup>1,2</sup>, Samir JABER<sup>3</sup>, Daniel VERZILLI<sup>3</sup>, Christophe JACOB<sup>4</sup>, Brigitte HUIBAN<sup>4</sup>, Emmanuel FUTIER<sup>5</sup>, Thomas KERFORNE<sup>6</sup>, Victoire PATEAU<sup>2,7</sup>, Pierre-Alexandre BOUCHARD<sup>8</sup>, Maellen GOUILLOU<sup>9</sup>, Emmanuel NOWAK<sup>9</sup>, François LELLOUCHE<sup>8</sup>

<sup>1</sup>: Medical Intensive Care, CHRU de Brest – La Cavale Blanche, Bvd Tanguy-Prigent, 29609 Brest Cedex, France

<sup>2</sup>: LATIM INSERM UMR 1101, FHU Techsan, Université de Bretagne Occidentale, 29200 Brest, France

<sup>3</sup>: Intensive Care Unit, Department of Anesthesiology B, DAR B CHU de Montpellier, Hôpital Saint Eloi, Université Montpellier 1, France

<sup>4</sup>: Anesthesiology Department, CHRU de Brest – La Cavale Blanche, Bvd Tanguy-Prigent, 29609 Brest Cedex, France

<sup>5</sup>: Anesthesiology Department, Hôpital Estaing, Centre Hospitalier Universitaire Clermont-Ferrand, Clermont-Ferrand, France

<sup>6</sup>: Anesthesiology Department, CHU de Poitiers, Cedex, France

<sup>7</sup>: Oxynov Inc., Technopôle Brest Iroise, 135 rue Claude Chappe, 29280 Plouzané, France

<sup>8</sup>: Centre de recherche de l'Institut de Cardiologie et de Pneumologie de Québec, 2725, chemin Sainte-Foy, Québec (Québec) G1V 4G5, Canada

<sup>9</sup>: Centre d'Investigation Clinique CIC INSERM 1412, CHRU Brest – La Cavale Blanche, Bvd Tanguy-Prigent, 29609 Brest Cedex, France

## **Corresponding Author**

Pr Erwan L'HER  
Médecine Intensive et Réanimation  
CHRU de Brest – La Cavale Blanche  
Bvd Tanguy-Prigent  
29609 BREST Cedex  
France

Email : [Erwan.lher@chu-brest.fr](mailto:Erwan.lher@chu-brest.fr)

Tel : +(33) 298 347 181

**Word Count** : 3800

## **ABSTRACT**



## Introduction

Hypoxemia and hyperoxia may occur after surgery with potential related complications. The FreeO<sub>2</sub> Post-Op trial is a prospective, multicenter, randomized, controlled trial that evaluates the clinical impact of automated O<sub>2</sub> administration vs. conventional O<sub>2</sub> therapy after major abdominal or thoracic surgeries. The study is powered to demonstrate benefits of automated oxygen titration and weaning in term of oxygenation, which is an important surrogate for complications after such interventions.

## Methods and Analysis

After extubation, patients are randomly assigned to the *Standard* (manual O<sub>2</sub> administration) or *FreeO<sub>2</sub>* group (automated closed-loop O<sub>2</sub> administration). Stratification is performed for the study center and a medical history of COPD. Primary outcome is the percentage of time spent in the target zone of oxygen saturation, during a 3-days time frame. In both groups, patients will benefit from continuous oximetry recordings. The target zone of oxygen saturation is SpO<sub>2</sub> = 88-92% for COPD and 92-96% for non-COPD patients. Secondary outcomes are the nursing workload assessed by the number of manual O<sub>2</sub> flow adjustments, the time spent with severe desaturation (SpO<sub>2</sub> <85%) and hyperoxia area (SpO<sub>2</sub> > 98%), the time spent in a hyperoxia area (SpO<sub>2</sub> > 98%), the oxygen consumption, the duration of oxygen administration during hospitalization, the frequency of use of mechanical ventilation (invasive or noninvasive), the duration of the post-recovery room stay, the hospitalization length of stay and the survival rate.

## Ethics and Dissemination

The Institutional Review Board of the University Hospital of Brest (France) approved the trial for all French centers (IDRCB RB14-060), and the institutional review board from the Québec Heart and Lung Institute (Canada) approved the trial for their own center. The results of the study will be presented at academic conferences and submitted to peer-reviewed journals.

**Trial registration:** [clinicaltrials.gov](https://clinicaltrials.gov) identifier NCT02546830

**Keywords:** oxygen therapy, postoperative complications, thoracic surgery, abdominal surgery, hypoxemia, hyperoxia

### **Strengths and limitations:**

- The FreeO<sub>2</sub> PostOp trial is the first and largest clinical evaluation of automated oxygen titration over standard of care in patients undergoing major surgeries;
- As automated oxygen titration is not the standard of care for postoperative patients, the study was designed as a superiority study;
- The use of continuous and non-averaged SpO<sub>2</sub> values monitoring in all groups of patients enables precise oxygenation evaluation during the entire study period;
- One limitation of the study is that investigators are aware of the inclusion group, while blinding is difficult in studies with respiratory support;
- Second limitation could be that the oxygenation status assessment would have been more precise using arterial blood gases.

## INTRODUCTION

### Background and Rationale

Current standards for prescribing oxygen recommend providing adequate flows to correct hypoxemia and avoid hyperoxia.[1,2] While deleterious effects of hypoxemia are well known, the potential harmful effects of hyperoxia are underappreciated. Yet, hyperoxia may increase mortality in severe COPD patients [3-5] and may cause cardiac and neurological adverse toxicities in certain situations.[6-8] Precise control of O<sub>2</sub> flows is difficult to achieve in clinical practice and time-consuming.[9]

The FreeO<sub>2</sub> system (Oxynov Inc. Québec, Qc, Canada) is an innovative device, developed in collaboration between our researchers from Brest-France, Québec-Canada University Hospitals and Oxynov Inc. a R&D Spin-off from Laval University-Québec. FreeO<sub>2</sub> is a closed-loop device that automates oxygen administration to spontaneously breathing patients, in response to pulse oximetry (SpO<sub>2</sub>) continuous measurements.[10] Automated O<sub>2</sub> administration allows to maintain constant SpO<sub>2</sub> within a pre-determined range using variable O<sub>2</sub> flows, as opposed to manual O<sub>2</sub> administration where the flow is kept constant, with variable SpO<sub>2</sub> values. In preterm infants receiving mechanical ventilation, automated O<sub>2</sub> control results in more time spent within the intended SpO<sub>2</sub> target.[11-13] In a healthy adult model with induced hypoxemia, such a system was more efficient to maintain SpO<sub>2</sub> within the oxygenation target, while ensuring a significant reduction of hypoxemia and hyperoxia periods, as compared to constant O<sub>2</sub> flows.[14] Its efficacy has also been validated in hospitalized COPD patients,[15] or during the early emergency care of patients with acute respiratory distress.[10]

Following major abdominal or thoracic surgery, the risk of hypoxemia may be high while considering patients' clinical status (OSA, restrictive pathologies related to obesity, frequent co-morbidities), the type of surgery and anesthesia.[16-21] Hypoxemia may occur either during the immediate postoperative period (they are mainly related to surgery or anesthesia) or may be delayed up to 3-days without clear trigger or underlying pathologies. The potential interest of the FreeO<sub>2</sub> system, using artificial intelligence closed-loop adjustments and predictive analytics, will thus be 1- to perform frequent and rapid O<sub>2</sub>

1  
2  
3 adjustments in response to oxygenation condition variations (up to each second), or to any  
4 physiological condition changes (movement, speech, eating, toilet); 2- to enable remote  
5 monitoring and data recording in isolated clinical settings (*i.e.* non-ICU surgical ward), in  
6 order to detect clinical deterioration at a very early stage through integration and fusion of  
7 informations; 3- to avoid maintenance of un-necessary high O<sub>2</sub> flow that may be potentially  
8 deleterious (hypercapnia worsening, coronary and/or cerebral arteries vasoconstriction...).

## 15 16 **Objectives**

17  
18 The aim of the study is to assess the use feasibility of the FreeO<sub>2</sub> system so as to deliver  
19 automatically oxygen in the post anesthesia care unit in a patient population admitted for  
20 major abdominal and thoracic surgery. Our hypothesis is that the FreeO<sub>2</sub> system will provide  
21 a better control of the oxygen saturation and reduce postoperative hypoxemia.  
22  
23  
24  
25

## 26 27 **Trial design**

28  
29 The FreeO<sub>2</sub> PostOp study is an investigator-initiated, prospective, multicenter, randomized,  
30 control, open trial on medical devices comparing two strategies of oxygen therapy following  
31 major surgeries with either standard treatment or automated closed-loop oxygenation.  
32 Patients are randomly assigned to the *Standard* (manual O<sub>2</sub> administration) or *FreeO<sub>2</sub>* group  
33 (automated closed-loop O<sub>2</sub> administration).  
34  
35  
36  
37  
38  
39  
40  
41  
42  
43  
44  
45  
46  
47  
48  
49  
50  
51  
52  
53  
54  
55  
56  
57  
58  
59  
60

## METHODS: PATIENTS, INTERVENTIONS AND OUTCOMES

### Study setting

The FreeO<sub>2</sub> PostOp study is taking place in 5 different university hospitals in France and Canada (Brest, Clermont-Ferrand, Montpellier, Poitiers, Québec). The Institutional Review Board of the University Hospital of Brest (France) approved the trial for all French centers (IDRCB RB14-060). The institutional review board from the Québec Heart and Lung Institute (Canada) approved the trial for their own center. The FreeO<sub>2</sub> Post-Op study is conducted in accordance with the declaration of Helsinki and was registered on September 11, 2015 at <http://www.clinicaltrials.gov> with trial identification number NCT02546830. First patient inclusion was performed on January 14<sup>th</sup> of 2016. The entire study will be performed in accordance with the *International Conference on Harmonisation and Good Clinical Practice guidelines*.<sup>[22]</sup>

### Eligibility criteria

#### *Inclusion criteria*

To be included, adult patients ( $\geq 18$  years) may be screened for scheduled abdominal or thoracic surgery during the anesthesia consultation and be considered as requiring general anesthesia with an expected duration of two hours or more in the participating centers.

Patients with intermediate to high risk for postoperative pulmonary complications following abdominal surgery with general anesthesia are eligible for participation. To identify such patients, the ARISCAT risk score will be used.<sup>[23]</sup> An ARISCAT risk score  $\geq 26$  is associated with an intermediate to high risk for postoperative pulmonary complications.

Informed consent is to be signed before the surgery. (Figure 1).

#### *Exclusion criteria*

Patients fulfilling one or more of the following criteria will not be included: life-threatening condition requiring an unplanned emergent surgery, lack of informed consent prior to

1  
2  
3 randomization, non-adult patients (age <18 years), patients with a body mass index  $\geq 35$   
4 kg/m<sup>2</sup>, patients with obstructive sleep apnea, pregnant or lactating women, perturbed or  
5 non-cooperative patients, to provide a relatively homogenous study population and avoid  
6 potential confounding factors in the interpretation.  
7  
8  
9

### 10 11 12 13 **Randomization criteria**

14  
15  
16 Patients will be randomized if they fulfill all the following criteria: availability of the FreeO<sub>2</sub>  
17 prototype; absence of criteria of severity justifying the immediate utilization of ventilatory  
18 support (loss of consciousness with a Glasgow Coma Score  $\leq 12$ , serious ventricular rhythm  
19 disorders, hemodynamic instability (SBP <80mmHg or recourse to vasopressors), cardiac or  
20 respiratory arrest, pH < 7.35 and PaCO<sub>2</sub> > 55 mm Hg (if measured), necessity of an O<sub>2</sub> flow  
21 less than 15 L/min to maintain a SpO<sub>2</sub> higher than 92%; no emergent surgery required for an  
22 adverse event; pulse oximetry signal is available.  
23  
24  
25  
26  
27  
28  
29

### 30 31 **Study intervention**

32 Patients eligible for randomization will be randomly assigned to the *Standard* or *FreeO<sub>2</sub>*  
33 group (Figure 2). The maximal study duration is 3 days. The study was stopped before 3 days  
34 if patient was discharge earlier from hospital or in case of discomfort while keeping nasal  
35 prongs and sensors.  
36  
37  
38  
39

40 Automated O<sub>2</sub> administration is performed using the FreeO<sub>2</sub> system (Oxynov Inc., Québec,  
41 QC, Canada) that is set to maintain SpO<sub>2</sub> between 92-96% for non-COPD patients or between  
42 88-92% for COPD patients. FreeO<sub>2</sub> is equipped with a SpO<sub>2</sub> monitor and an electronically-  
43 controlled valve that automatically adjusts O<sub>2</sub> flows from 0 to 20 L/min on a per second  
44 basis, with a 0.1 L/min precision, according to a closed-loop algorithm in order to reach the  
45 predetermined SpO<sub>2</sub> target.[14] Conventional O<sub>2</sub> is administered using manual flowmeters,  
46 according to standard procedures. All participating units were encouraged to use the same  
47 standardized SpO<sub>2</sub> target as in the automated O<sub>2</sub> administration group, as recommended in  
48 international guidelines.[1,2] In both arms, oxygen can be administered either using nasal  
49 prongs for low flow (O<sub>2</sub> < 6 L/min), or standard face mask in all cases (O<sub>2</sub> = 0-20 L/min).  
50  
51  
52  
53  
54  
55  
56  
57

58 Continuous oximetry recordings are performed in each group during the 3 days of the study,  
59 using the FreeO<sub>2</sub> monitoring system connected to Nonin© 6000 CA flexible adult single-use  
60

1  
2  
3 digital sensors. Position of the sensors is to be controlled at least every 12-hours. In the  
4 FreeO<sub>2</sub> group, the FreeO<sub>2</sub> will be used both for oxygen administration and for recording. In  
5 the Standard group, the FreeO<sub>2</sub> will be used in the recording only and the oxygen  
6 administration will be set manually.  
7  
8  
9

### 10 11 12 **Standard procedures**

13  
14 Considering the variety of pathological cases for patients attending the recovery room,  
15 medical treatment, including the other respiratory support, is determined by the attending  
16 physicians based on clinical needs assessment. All other aspects of patient care after  
17 inclusion in the study, including fluid administration, prophylactic antibiotics and  
18 postoperative pain management, are made at clinicians' discretion based on the expertise of  
19 the staff at each center and routine clinical practice.  
20  
21  
22  
23  
24  
25

### 26 27 **Primary outcome measure**

28  
29 The primary outcome measure will be the percentage of time spent in the target zone of  
30 oxygen saturation, during a 3-days time frame. In both groups (*Standard* and *FreeO<sub>2</sub>*),  
31 patients will be connected to the FreeO<sub>2</sub> system to enable continuous oximetry recordings of  
32 one SpO<sub>2</sub> value per second, either in the recording mode for patients assigned to the  
33 *Standard* group, or in the automated closed-loop mode for patients assigned to the *FreeO<sub>2</sub>*  
34 group.  
35  
36  
37  
38  
39

40 The target zone of oxygen saturation is SpO<sub>2</sub> = 88-92% for COPD and 92-96% for non-COPD  
41 patients.  
42  
43  
44  
45

### 46 47 **Secondary outcome measures**

48 Several secondary outcome measures will be evaluated during a 3-days time frame : nursing  
49 workload assessed by the number of manual O<sub>2</sub> flow adjustments and airway management  
50 procedures (twice daily assessment); time spent with severe desaturation (SpO<sub>2</sub><85%); time  
51 spent with hyperoxia (SpO<sub>2</sub>> 98%); oxygen consumption measured at the end of  
52 administration. All data related to oxygenation will be recorded in both groups using the  
53 FreeO<sub>2</sub> device, enabling us to qualify desaturation using the Oxygen Desaturation Index at  
54 different levels (ODI2% and ODI4%).  
55  
56  
57  
58  
59  
60

1  
2  
3 Other outcome measures will be assessed during a maximal 28-days time frame: duration of  
4 oxygen administration during hospitalization, number of complications related to the  
5 administration of oxygen; frequency of use of ventilation (invasive or noninvasive); duration  
6 of hospitalization; survival rate.  
7  
8  
9

## 10 11 12 **Participant timeline**

13  
14 Figure 1 shows the participant timeline of the FreeO<sub>2</sub> PostOp study.  
15  
16

## 17 18 **Sample size**

19  
20 Based on previous studies and data from the literature,[10,20] we estimated a 85% time  
21 within oxygenation range with the automated closed-loop oxygen administration system  
22 (FreeO<sub>2</sub>) during the 3 days following surgery and a standard deviation equal or more than  
23 30%. A total number of 180 patients will be needed to demonstrate a 15% decrease in  
24 absolute difference between the *Standard* and *FreeO<sub>2</sub>* groups (90 patients in each group).  
25 The  $\alpha$  risk is 5% and the  $\beta$  risk is 10% with a bilateral formulation. The expected duration of  
26 patient enrolment will be 3 years.  
27  
28  
29  
30  
31  
32  
33

## 34 35 **METHODS: ASSIGNMENT OF INTERVENTION**

### 36 37 **Allocation and sequence generation**

38  
39 A computer-generated randomization is performed in the post-recovery room, within a one-  
40 hour delay after endotracheal extubation. It is performed using random blocks in a 1:1 ratio,  
41 with the use of a centralized web-based management system (Clinfile). Stratification is  
42 performed either according to the study center and a medical history of COPD. After  
43 randomization, treatment is to be initiated within less than one hour.  
44  
45  
46  
47  
48  
49

### 50 51 **Blinding**

52  
53 Although the individual study assignments of the patients will not be masked, the  
54 coordinating center and all the investigators will remain unaware of the study group  
55 outcomes until the data will be locked.  
56  
57  
58  
59  
60



## **METHODS: DATA COLLECTION, MANAGEMENT AND ANALYSIS**

### **Data collection and management**

At the time of enrolment, physiological characteristics, coexisting medical conditions, surgery and anaesthetics characteristics, and oxygen flow rates are recorded. In both groups, pulse oximetry, respiratory and heart rate, are continuously monitored using a dedicated software enabling data extraction from the FreeO<sub>2</sub> device. Each hour during the first 3 hours following randomization and daily during the following 3 days, all standard clinical parameters are collected. Evolution and clinical outcomes are monitored at Day 28.

Data are collected and recorded on an e-CRF by a trained investigator or research assistant at each centre. A blank copy of the e-CRF can be printed from the e-CRF; this enables the investigator or research assistant to fill it out with the data of the included patients, which will thereby be captured. Once data collection has been completed, the investigator or research assistant shall sign and date the copy. This document will constitute an integral part of the patient's medical records; as such, it shall be retained permanently. Data recorded in the e-CRF that originate in source documents must be consistent with each other; if they are not, the differences have got to be justified and documented.

### **Statistical methods**

All the analyses will be performed by the study statistician.

A predefined statistical analysis plan will be followed. The analysis will be performed on an intention-to-treat basis after validation by a blind review committee of the inclusion and exclusion criteria for each patient. All the analyses will be conducted by the biostatistics department of the *Centre d'Investigation Clinique* from Brest University Hospital (CIC INSERM 1412) using SAS, V.9.3 statistical software (SAS Institute, Cary, North Carolina, USA).

A two-tailed P value equal or less than 0.05 will be considered as statistically significant.

### ***Descriptive analysis of patient groups at baseline***

The continuous variables will be analyzed using standard parameters (median, interquartile ranges and extreme values, or mean and SD), while indicating the number of missing data.

The category variables will be presented in the form of absolute frequency and percentage, in each treatment group.

1  
2  
3 The criteria of subject selection will be verified based on the data recorded in the electronic  
4 case reports. Falsely included subjects such as those lost to follow-up will be described.  
5  
6 Deviations from the protocol will be described and analyzed on a case-by-case basis.  
7  
8  
9

### 10 ***Analysis pertaining to the main criteria of evaluation***

11  
12 The percentages of time within the considered SpO<sub>2</sub> range will be compared between the  
13 two groups by means of a variance analysis, according to stratification.  
14  
15

### 16 ***Analysis pertaining to the secondary criteria of evaluation***

17  
18 Secondary criteria of evaluation will be compared between the two treatment groups by  
19 means of the Student's t-test (or the Mann–Whitney U test, if necessary) for continuous  
20 quantitative variables and by means of the X<sup>2</sup> test (or Fisher's exact test) for qualitative  
21 variables.  
22  
23  
24  
25  
26  
27  
28  
29

## 30 **METHODS: MONITORING**

### 31 **Data monitoring**

32  
33 Before starting patient enrolment, all physicians and other healthcare workers in the ICU  
34 attend formal training sessions on the study protocol and data collection.  
35  
36

37 An investigator at each center is responsible for daily patient screening, enrolling patients in  
38 the study, ensuring adherence to the protocol and completing the e-CRF. Research assistants  
39 regularly monitor all the centers on site to check adherence to the protocol and the accuracy  
40 of the data recorded.  
41  
42  
43  
44  
45  
46

### 47 **Harms**

48  
49 The investigator is allowed to temporarily, or permanently discontinue the participation of a  
50 patient in the study for any reason that would optimally serve the interests of the subject,  
51 particularly in case of serious adverse events suspected to be associated with the type of  
52 oxygenation method that is used.  
53  
54  
55  
56  
57

### 58 **Auditing**

1  
2  
3 The trial is overseen by a steering committee and an independent safety monitoring board  
4 composed of three independent experts (Jean-Pierre Frat, Christophe Guitton, Alain  
5 Mercat). All centers are monitored by the promotor to check adherence to the protocol, and  
6 accuracy of recorded data. An investigator at each center is responsible for enrolling patients  
7 and ensuring adherence to the protocol. Research assistants at each center are responsible  
8 for patients' follow-up, and for completing the electronic case-report form.  
9  
10  
11  
12  
13  
14  
15  
16

## 17 **ETHICS AND DISSEMINATION**

18  
19 The French national agency for drug and biomedical devices security (ANSM) approved the  
20 use of the FreeO<sub>2</sub> device within this study on the 5<sup>th</sup> of August 2014. The Institutional Review  
21 Board of the University Hospital of Brest, France (CPP Ouest 6 -845) approved the trial for all  
22 French centers on the 2<sup>nd</sup> of February 2015 (IDRCB RB14-060). The main modification of the  
23 protocol was made after obtaining CE marking for the device (Protocol version #3), other  
24 amendments were related to investigators changes and an extension of the study length  
25 (final version: #5). The study sponsor notified all amendments to investigators. The  
26 institutional review board from the Québec Heart and Lung Institute (Canada) approved the  
27 trial for their own center.  
28  
29  
30  
31  
32  
33  
34  
35  
36  
37

### 38 **Consent or assent**

39 The patient is included after having provided a written informed consent to the investigator  
40 according to the decision of the central ethics committee. If the patient is not able to  
41 understand the information given, he/she can be included if the same procedure is  
42 completed with a next of kin. After the patient's recovery, he/she will be asked if he/she  
43 agrees to continue the trial.  
44  
45  
46  
47  
48  
49  
50

### 51 **Patient and public involvement**

52 Patients and the public were not involved in the design or conduct of the study. There is no  
53 plan to disseminate the results to study participants.  
54  
55  
56  
57

### 58 **Confidentiality**

1  
2  
3 Data will be handled according to French law. All original records will be archived at trial  
4 sites for 15 years. The clean database file will be anonymized and kept for 15 years.  
5  
6  
7

### 8 9 **Declaration of interest**

10 The FreeO<sub>2</sub> PostOp study is an investigator-initiated trial funded by the French Ministry of  
11 Health obtained in 2014 from a regional hospital clinical research programme (*Programme*  
12 *Hospitalier de Recherche Clinique Interrégional HUGO 2014*). A scientific committee including  
13 ELH, FL, and EN conceived, drafted and wrote the project. All other authors of the current  
14 manuscript are the investigators in the different centers. The study is promoted by the  
15 University Hospital of Brest.  
16  
17

18 ELH and FL are the inventors of the FreeO<sub>2</sub> device and founded Oxynov Inc. to develop the  
19 commercial device. The firm Oxynov Inc. provides the automated oxygen therapy equipment  
20 to all the participating centers but has no other involvement in the study.  
21  
22  
23  
24  
25  
26  
27  
28

### 29 **Access to data**

30 All investigators will have access to the final data set. Participant-level data sets will be made  
31 accessible on a controlled access basis.  
32  
33  
34  
35  
36

### 37 **Dissemination policy**

38 The protocol is reported according to the SPIRIT guidelines.[24] Findings will be submitted  
39 to peer-reviewed journals and presented at local, national and international meetings and  
40 conferences according to CONSORT guidelines.[25] to publicize and explain the research to  
41 clinicians, commissioners and service users.  
42  
43  
44

45 Authorship eligibility guidelines will take into account participation to the protocol design  
46 and writing, final analysis of the results, patients' recruitment, and final manuscript revision.  
47  
48  
49  
50  
51  
52  
53  
54  
55  
56  
57  
58  
59  
60

## DISCUSSION

In postoperative patients, pulmonary function is markedly altered both by general anesthesia, mechanical ventilation and surgery. Postoperative respiratory complications following surgery are the second most frequent complications after surgery [19] and considered as a major cause of morbidity and mortality. [17,26,27] The FreeO<sub>2</sub> PostOp trial is the first clinical evaluation of automated oxygen titration in patients undergoing major abdominal or thoracic surgeries. The objectives of the study are to compare the oxygenation parameters (time in the oxygenation target, time with hypoxemia and with hyperoxia) with usual oxygen therapy and automated oxygen titration and weaning.

### ***Risk and consequences of hypoxemia***

There is a good level of evidence and good acceptance by the medical community that hypoxemia is harmful,[28] especially in adult patients with myocardial ischemia,[29] neuro-trauma.[30] Data also suggests that even short periods of hypoxemia may promote significant negative hemodynamic effects.[31] In an animal model, right ventricular dilation was observed with only 2 hours of daily hypoxemia.[32]

During the postoperative period, the occurrence of marked oxygen desaturation related to periodic apnea and hypoventilation for several hours has been recognized for a long time,[33,34] with potentially severe consequences such as myocardial ischemia.[35] The incidence of hypoxemia is high in the recovery room (10-50%),[20] and up to 50% of postoperative patients will demonstrate episodic hypoxemia in the absence of O<sub>2</sub> therapy. [36,37] It has also been shown that desaturation episodes are more frequent on the first night after surgery, but may also worsened 3-5 days postoperatively, especially in patients with obstructive sleep apnea.[38-40]

Pathophysiology of these O<sub>2</sub> desaturations is complex but may be due either to the patient's condition itself (advanced age, COPD, diabetes, obesity...), respiratory mechanics modifications (reduction of functional residual capacity, atelectasis, thoracoabdominal compliance decrease), but also to the use of pharmaceutical agents that are given during surgery (anesthetics and neuromuscular blocking drugs), or those that are given to relief postoperative pain (opioids and sedatives).[34]

1  
2  
3 Our hypothesis is that desaturations will be reduced with the automated oxygen titration  
4 (FreeO<sub>2</sub> group), as the oxygen flow is titrated every second and that desaturations will  
5 immediately lead to increasing of oxygen flowrate. In previous studies comparing manual  
6 and automated oxygen administration, it was demonstrated that time with hypoxemia was  
7 reduced with FreeO<sub>2</sub>.<sup>[10,15]</sup> However, no data are available during the postoperative care.  
8  
9  
10  
11  
12

### 13 14 ***Automated weaning of oxygen***

15  
16 Oxygen supplementation has initially been promoted to decrease postoperative hypoxemia,  
17 even if it is also known that it will not have any effect on the overall number of central or  
18 obstructive apnea, neither atelectasis.<sup>[33]</sup> Not all patients will benefit from systematic O<sub>2</sub>  
19 administration,<sup>[41]</sup> but probably only specific patients with a high-risk profile, especially  
20 those following long duration and major thoracic or abdominal surgery.<sup>[42-44]</sup> Moreover,  
21 standard continuous O<sub>2</sub> therapy tends to reduce but not abolish the occurrence of  
22 desaturation,<sup>[36]</sup> given the fact that only point checks are made to adjust O<sub>2</sub> flow to actual  
23 patients' needs.  
24  
25  
26  
27  
28  
29

30  
31 It has also been demonstrated that the duration of O<sub>2</sub> therapy was an independent risk  
32 factor for developing postoperative respiratory complications. Patients who require O<sub>2</sub> for  
33  $\geq 75\%$  of recovery room time (or greater than 90 min) appear to be at greater risk of  
34 developing respiratory complications.<sup>[45]</sup> This fact may suggest that some patients are not  
35 adequately screened for risk factors such as OSA by standard pre-anesthesia testing, and  
36 that a device dedicated to continuous monitoring of O<sub>2</sub> administration (either alarms on  
37 duration and flow variations) may help to detect such high-risk patients. The increased  
38 resource utilization in patients with longer oxygen therapy requirement in the recovery  
39 room likely reflects the increase in occurrence of pulmonary respiratory complications  
40 requiring invasive and non-invasive ventilatory support, especially on the day of surgery.  
41  
42  
43  
44  
45  
46  
47

48  
49 In L'Her et al study, it was shown that the partial or complete oxygen weaning was  
50 significantly increased with automated oxygen titration in comparison with standard oxygen  
51 administration, in patients managed in the emergency department during 3 hours.<sup>[10]</sup>  
52  
53

54  
55 In the specific setting of post-operative patients, the reduction of the weaning time may  
56 improve the efficiency of the turn-over of the patients in the recovery room.  
57  
58  
59

### 60 ***Risk and consequences of hyperoxemia***

1  
2  
3 Few studies have promoted the utilization of hyperoxia during and after colo-rectal surgery  
4 to reduce wound infection [46] but this is not recommended in routine, given controversial  
5 data.[47-49] In a post-hoc analysis of the PROXI trial, the authors even pointed out the  
6 potential risks of acute coronary syndromes associated with perioperative hyperoxia.[50]  
7  
8 The pathophysiological risks associated with hyperoxia are described for a long time,  
9 especially in COPD patients.[4] The first recommendation to adjust oxygen flow rates in  
10 order to reduce the risks of hyperoxia was published in the early 60's,[51] and several more  
11 recent guidelines have reiterated similar recommendations.[1,2] The recent demonstration  
12 in a large randomized controlled trial of an increased mortality for ICU patients assigned to a  
13 standard O<sub>2</sub> therapy practice, as compared to a more conservative one (absolute risk  
14 reduction 0.086 [95% CI, 0.017-0.150]; p=0.01) has revived the debate about potential harm  
15 of excessive oxygen therapy in an unselected patients' population.[52] Adverse effects of  
16 hyperoxia could be mediated through a higher oxidative stress, but also increased coronary  
17 [6,7] and cerebral arteries resistances,[8] all being associated with a potential clinical  
18 impact.[53,54] Such potential adverse events related to hyperoxia clearly mandates  
19 attention in avoiding unnecessary O<sub>2</sub> administration. It was demonstrated in two  
20 randomized trials from our team,[10,15] that time with hyperoxia could be reduced with  
21 automated oxygen titration, and the hypothesis of the present study is that this problem will  
22 also be reduced after thoracic or abdominal surgeries.  
23  
24  
25  
26  
27  
28  
29  
30  
31  
32  
33  
34  
35  
36  
37  
38  
39  
40  
41  
42

### ***Clinical data with automated oxygen titration***

43 Several systems have been developed to titrate oxygen flow rate in neonates and in adult  
44 patients.[10,14] In a previous RCT on adult patients admitted to the ED for acute hypoxemic  
45 respiratory failure, the use of automated O<sub>2</sub> administration was found superior to manual O<sub>2</sub>  
46 administration to improve the time spent within oxygenation targets, with a between-group  
47 difference of 29%,[10] as already observed in other studies on O<sub>2</sub> automated  
48 administration.[55,56] In L'Her et al study, patients experienced less time with hypoxemia  
49 and hyperoxia in the FreeO<sub>2</sub> group.[10] When receiving automated oxygen, partial or  
50 complete oxygen weaning was more frequent during initial care, as compared to standard  
51 manual O<sub>2</sub> administration.  
52  
53  
54  
55  
56  
57  
58  
59  
60

1  
2  
3 As automated closed-loop O<sub>2</sub> administration is not the standard of care for postoperative  
4 patients, we did not design this study as a non-inferiority study but rather as a superiority  
5 study. One limitation of the study is that investigators are aware of the inclusion group, and  
6 blinding is difficult in studies with respiratory support. However, given the characteristics of  
7 the two strategies under evaluation, a double-blind trial was not possible. Second, the  
8 assessment of the oxygenation status could be considered as more precise by analyzing  
9 blood gas sample rather than SpO<sub>2</sub>. However, this would not enable continuous oxygenation  
10 monitoring up to 3-days. Moreover, only continuous of non-averaged SpO<sub>2</sub> values do enable  
11 precise and rapid adjustments of the O<sub>2</sub> flow, in response to exact patients' needs.

12  
13  
14  
15  
16  
17  
18  
19 Noteworthy, all patients in both groups will be continuously monitored using the same  
20 oximeter, which may represent a strength of this study; therefore, the FreeO<sub>2</sub> PostOp will  
21 also represent the largest prospective study comparing two oxygenation strategies over such  
22 a period in the postoperative setting.  
23  
24  
25  
26  
27

28  
29 In conclusion, the FreeO<sub>2</sub> PostOp trial is a pragmatic RCT designed to test the hypothesis that  
30 automated closed-loop O<sub>2</sub> administration is superior to standard manual O<sub>2</sub> administration,  
31 during the postoperative care of patients with major abdominal or thoracic surgery. To the  
32 best of our knowledge, the FreeO<sub>2</sub> PostOp trial is the first to evaluate the usefulness of  
33 automated closed-loop O<sub>2</sub> administration after extubation in such an indication.  
34  
35  
36  
37  
38  
39  
40  
41  
42  
43  
44  
45  
46  
47  
48  
49  
50  
51  
52  
53  
54  
55  
56  
57  
58  
59  
60



## REFERENCES

- 1- O'Driscoll BR, Howard LS, Earis J, et al. BTS guidelines for oxygen use in adults in healthcare and emergency settings. *Thorax* 2017; 72: i1-i90.
- 2- GOLD Scientific Committee. Global strategy for the diagnosis, management, and prevention of chronic obstructive pulmonary disease 2016. <http://goldcopd.org/global-strategy-diagnosis-management-prevention-copd-2016>  
Date last accessed: March 30, 2018.
- 3- Abdo WF, Heunks LMA. Oxygen-induced hypercapnia in COPD: myths and facts. *Crit Care* 2012; 16: 323.
- 4- Aubier M, Murciano D, Miloc-Emili J et al. Effects of the administration of O<sub>2</sub> on ventilation and blood gases in patients with chronic obstructive pulmonary disease during acute respiratory failure. *Am Rev Respir Dis* 1980; 122: 747-754.
- 5- Austin MA, Wills KE, Blizzard L et al. Effect of high flow oxygen on mortality in chronic obstructive pulmonary disease patients in prehospital setting: randomized controlled trial. *BMJ* 2010; 341: c5642.
- 6- Wijesinghe M, Perrin K, Ranchord A, et al. Routine use of oxygen in the treatment of myocardial infarction: systematic review. *Heart* 2009; 95: 198-202.
- 7- Farquhar H, Weatherall M, Wijesinghe M, et al. Systematic review of studies of the effect of hyperoxia on coronary blood flow. *Am Heart J* 2009; 158: 371-317.
- 8- Floyd TF, Clark JM, Gelfand R, et al. Independent cerebral vasoconstrictive effects of hyperoxia and accompanying arterial hypocapnia at 1 ATA. *J Appl Physiol* 2003; 95: 2453-2461.

- 1  
2  
3 9- Mok W, Wang W, Cooper S, et al. Attitudes towards vital signs monitoring in the  
4  
5 detection of clinical deterioration: scale development and survey ward nurses. *Int J*  
6  
7 *Qual Health Care* 2015; 27: 207-213.  
8  
9
- 10 10- L'Her E, Dias P, Gouillou M, et al. Automatic versus manual oxygen administration in  
11  
12 the emergency department. *Eur Respir J* 2017; 50: 1602552.  
13  
14
- 15 11- Claire N, Gerhardt T, Everett R, et al. Closed-loop controlled inspired oxygen  
16  
17 concentration for mechanically ventilated very low birth weight infants with frequent  
18  
19 episodes of hypoxemia. *Pediatrics* 2001; 107: 1120-1124.  
20  
21
- 22 12- Claire N, Bancalari E, D'Ugard C, et al. Multicenter crossover study of automated  
23  
24 controlled of inspired oxygen in ventilated preterm infants. *Pediatrics* 2011; 127: e76-  
25  
26 e83.  
27  
28
- 29 13- Hallenberger A, Poets CF, Hom W, et al. Closed-loop automatic oxygen control (CLAC)  
30  
31 in preterm infants: a randomized controlled trial. *Pediatrics* 2014; 133: e379-e385.  
32  
33
- 34 14- Lellouche F, L'Her E. Automated oxygen flow titration to maintain constant  
35  
36 oxygenation. *Respir Care* 2012; 57: 1254-1262.  
37  
38
- 39 15- Lellouche F, Bouchard PA, Roberge M, et al. Automated oxygen titration and weaning  
40  
41 with FreeO2 in patients with acute exacerbation of COPD: a pilot randomized trial. *Int*  
42  
43 *J Chron Obstruct Pulmon Dis* 2016; 11: 1983-1990.  
44  
45
- 46 16- Weiser TG, Regenbogen SE, Thompson KD, et al. An estimation of the global volume  
47  
48 of surgery: a modeling strategy based on available data. *Lancet* 2008; 372: 139-144.  
49  
50
- 51 17- Khuri SF, Henderson WG, DePalma RG, et al. Determinants of long-term survival after  
52  
53 major surgery and the adverse effect of postoperative complications. *Ann Surg* 2005;  
54  
55 242: 326-341.  
56  
57  
58  
59  
60

- 1  
2  
3 18-Shander A, Fleisher LA, Barie PS, et al. Clinical and economic burden of postoperative  
4 complications: patient safety summit on definition, risk-reducing interventions, and  
5 preventive strategies. *Crit Care Med* 2011; 39: 2163-2172.  
6  
7  
8  
9  
10 19-Arozullah AM, Daley J, Henderson WG, et al. Multifactorial risk index for predicting  
11 postoperative respiratory failure in men after major noncardiac surgery. The National  
12 Veterans Administration Surgical Quality Improvement Program. *Ann Surg* 2000; 232:  
13 242-253.  
14  
15  
16  
17  
18  
19  
20 20-Lawrence VA, Dhanda R, Hilsenbeck SG, et al. Risk of pulmonary complications after  
21 elective abdominal surgery. *Chest* 1996; 110: 744-750.  
22  
23  
24  
25 21-Lindberg P, Gunnarsson L, Tokics L, et al. Atelectasis and lung function in the  
26 postoperative period. *Acta Anaesthesiol Scand* 1992; 36: 546-553.  
27  
28  
29  
30 22-International council for harmonization of technical requirements for  
31 pharmaceuticals for human use. Guidelines for good clinical practice – R2 November  
32 2016.  
33  
34  
35  
36  
37 [http://www.ich.org/fileadmin/Public\\_Web\\_Site/ICH\\_Products/Guidelines/Efficacy/E](http://www.ich.org/fileadmin/Public_Web_Site/ICH_Products/Guidelines/Efficacy/E6/E6_R2_Step_4_2016_1109.pdf)  
38 [6/E6\\_R2\\_Step\\_4\\_2016\\_1109.pdf](http://www.ich.org/fileadmin/Public_Web_Site/ICH_Products/Guidelines/Efficacy/E6/E6_R2_Step_4_2016_1109.pdf) Date last accessed: August 7, 2018.  
39  
40  
41  
42 23-Mazo V, Sabaté S, Canet J, et al. Prospective external validation of a predictive score  
43 for postoperative pulmonary complications. *Anesthesiology* 2014; 121: 219-231.  
44  
45  
46  
47 24-Chan AW, Tetzlaff JM, Altman DG, et al. SPIRIT 2013 Statement: Defining standard  
48 protocol items for clinical trials. *Ann Intern Med* 2013; 158: 200-207.  
49  
50  
51  
52 25-Schulz KF, Altman DG, Moher D, for the CONSORT Group. CONSORT 2010 Statement:  
53 Updated guidelines for reporting parallel group randomized trials. *BMJ* 2010; 340:  
54 c332.  
55  
56  
57  
58  
59  
60

- 1  
2  
3 26-Karcz M, Papadakos PJ. Respiratory complications in the postanesthesia care unit: a  
4  
5 review of pathophysiological mechanisms. *Can J Respir Ther* 2013; 49: 21-29.  
6  
7  
8 27-Serpa Neto A, Hemmes SN, Barbas CS, et al. Incidence of mortality and morbidity  
9  
10 related to postoperative lung injury in patients who have undergone abdominal or  
11  
12 thoracic surgery: a systematic review and meta-analysis. *Lancet Respir Med* 2014; 2:  
13  
14 1007-1015.  
15  
16  
17  
18 28-Bateman NT, Leach RM. ABC of oxygen. Acute oxygen therapy. *BMJ* 1998; 317: 798-  
19  
20 801.  
21  
22  
23 29-Galattus-Jensen S, Hansen J, Rasmussen V, et al. Nocturnal hypoxaemia after  
24  
25 myocardial infarction: association with nocturnal myocardial ischaemia and  
26  
27 arrhythmias. *Br Heart J* 1994; 72: 23-30.  
28  
29  
30 30-DeWitt DS, Prough DS. Blast-induced brain injury and posttraumatic hypotension and  
31  
32 hypoxemia. *J Neurotrauma* 2009; 26: 877-887.  
33  
34  
35 31-Selinger SR, Kennedy TP, Buescher P, et al. Effects of removing oxygen from patients  
36  
37 with chronic obstructive disease. *Am Rev Respir Dis* 1987; 136: 85-91.  
38  
39  
40 32-Nattie EE, Doble EA. Threshold of intermittent hypoxia-induced right ventricular  
41  
42 hypertrophy in the rat. *Respir Physiol* 1984; 56: 253-259.  
43  
44  
45 33-Jones JG, Jordan C, Scudder C, et al. Episodic postoperative oxygen desaturation: the  
46  
47 value of added oxygen. *J R Soc Med* 1985; 78: 1019-1022.  
48  
49  
50 34-Catley DM, Thornton C, Jordan C, et al. Pronounced, episodic oxygen desaturation in  
51  
52 the postoperative period: its association with ventilatory pattern and analgesic  
53  
54 regimen. *Anesthesiology* 1985; 63: 20-28.  
55  
56  
57  
58  
59  
60

- 1  
2  
3 35-Gögenur I, Rosenberg-Adamsen S, Lie C, et al. relationship between nocturnal  
4 hypoxaemia, tachycardia and myocardial ischaemia after major abdominal surgery.  
5  
6 Br J Anaesth 2004; 93: 333-338.  
7  
8  
9
- 10 36-Canet J, Ricos M, Vidal F. Early postoperative arterial oxygen desaturation.  
11  
12 Determining factors and response to oxygen therapy. Anesth Analg 1989; 69: 207-  
13  
14 212.  
15  
16  
17
- 18 37-Ramanchandran SK, Nafiu OO, Ghaferi A, et al. Independent predictors and outcomes  
19  
20 of unanticipated early postoperative tracheal intubation after nonemergent,  
21  
22 noncardiac surgery. Anesthesiology 2011; 115: 44-53.  
23  
24
- 25 38-Gögenur I, Wildschiotz G, Rosenberg J. Circadian distribution of sleep phases after  
26  
27 major abdominal surgery. Br J Anaesth 2008; 100: 45-49.  
28  
29
- 30 39- Chung F, Liao P, Elsaid H, et al. Factors associated with postoperative exacerbation of  
31  
32 sleep-disordered breathing. Anesthesiology 2014; 120: 299-311.  
33  
34
- 35 40-Rosenberg J, Wildschiodtz G, Pedersen MH, et al. Late postoperative nocturnal  
36  
37 episodic hypoxaemia and associated sleep pattern. Br J Anaesth 1994; 72: 145-150.  
38  
39
- 40 41- Gift AG, Stanik J, Karpenik J, et al. Oxygen saturation in postoperative patients at low  
41  
42 risk for hypoxemia: is oxygen therapy needed? Anesth Analg 1995; 80: 368-372.  
43  
44
- 45 42-Pedersen T, Viby-Mogensen J, Ringsted C. Anaesthetic practice and postoperative  
46  
47 pulmonary complications. Acta Anaesthesiol Scand 1992; 36: 812-818.  
48  
49
- 50 43- Mathew JP, Rosenbaum SH, O'Connor T, et al. Emergency tracheal intubation in the  
51  
52 postoperative care unit: physician error or patient disease? Anesth Analg 1990; 71:  
53  
54 691-697.  
55  
56  
57  
58  
59  
60

- 1  
2  
3 44-Smetana GW, Lawrence VA, Cornell JE, et al. Preoperative pulmonary risk  
4 stratification for noncardiothoracic surgery: systematic review for the American  
5 College of Physicians. *Ann Intern Med* 2006; 144: 581-595.  
6  
7  
8  
9  
10 45-Ramachandran SK, Thompson A, Pandit JJ, et al. Retrospective observational  
11 evaluation of postoperative oxygen saturation levels and associated postoperative  
12 respiratory complications and hospital resource utilization. *PloS One* 2017 ;  
13 12:e0175408.  
14  
15  
16  
17  
18  
19 46-Greif R, Akça O, Horn EP, et al. Supplemental perioperative oxygen to reduce the  
20 incidence of surgical-wound infection. *N Engl J Med* 2000 ; 342: 161-167.  
21  
22  
23  
24  
25 47-Meyhoff CS, Wetterslev J, Jorgensen LN, et al. Effect of high perioperative oxygen  
26 fraction on surgical site infection and pulmonary complications after abdominal  
27 surgery: the PROXI randomized clinical trial. *JAMA* 2009; 302: 1543-1550.  
28  
29  
30  
31  
32 48-Togioka B, Galvagno S, Sumida S, et al. The role of perioperative high inspired oxygen  
33 therapy in reducing surgical site infection: a meta-analysis. *Anesth Analg* 2012; 114:  
34 334-342.  
35  
36  
37  
38  
39 49-Wetterslev J, Meyhoff CS, Jørgensen LN, et al. The effects of high perioperative  
40 inspiratory oxygen fraction for adult surgical patients. *Cochrane Database Syst Rev*  
41 2015 Jun 25;(6):CD008884.  
42  
43  
44  
45 50-Fonnes S, Gögenur I, Sondergaard ES, et al. Perioperative hyperoxia – Long-term  
46 impact on cardiovascular complications after abdominal surgery, a post-hoc analysis  
47 of the PROXI trial. *Int J Cardiol* 2016 ; 215 : 238-243.  
48  
49  
50 51-Campbell EJ. The J. Burns Amberson Lecture. The management of acute respiratory  
51 failure in chronic bronchitis and emphysema. *Am Rev Respir Dis* 1967 ; 96 : 626-639.  
52  
53  
54 52-Girardis M, Busani S, Damiani E, et al. Effect of conservative vs conventional oxygen  
55 therapy on mortality among patients in an intensive care unit : the Oxygen-ICU  
56 randomized clinical trial. *JAMA* 2016; 316 : 1583-1589.  
57  
58  
59  
60

- 1  
2  
3 53-Stub D, Smith K, Bernard S, et al. Air versus oxygen in ST-segment-elevation  
4 myocardial infarction. *Circulation* 2015; 131: 2143-2150.  
5  
6  
7 54- Damiani E, Adrario E, Girardis M, et al. Arterial hyperoxia and mortality in critically ill  
8 patients: a systematic review and meta-analysis. *Crit Care* 2014; 18: 711.  
9  
10 55- Cirio S, Nava S. Pilot study of a new device to titrate oxygen flow in hypoxic patients  
11 on long-term oxygen therapy. *Respir Care* 2011; 56: 429-434.  
12  
13 56- Rice KL, Schmidt MF, Buan JS, et al. AccuO2 oximetry-driven oxygen-conserving  
14 device versus fixed-dose oxygen devices in stable COPD patients. *Respir Care* 2011;  
15 56: 1901-1905.  
16  
17  
18  
19  
20  
21  
22  
23  
24  
25  
26  
27  
28  
29  
30  
31  
32  
33  
34  
35  
36  
37  
38  
39  
40  
41  
42  
43  
44  
45  
46  
47  
48  
49  
50  
51  
52  
53  
54  
55  
56  
57  
58  
59  
60

## Footnotes

**Contributors** E-LH and F-L designed this study, drafted the manuscript of the protocol and critically revised the manuscript. E-LH, S-J, D-V, C-J, B-H, E-F, T-K, V-P, PA-B, and F-L participated in the conduct of the study. M-G and E-N participated in the protocol methodological assessment and statistical plan. All authors read and approved the final manuscript.

**Funding** This trial was funded by the French Ministry of Health obtained in 2014 from a regional hospital clinical research programme (*Programme Hospitalier de Recherche Clinique Interrégional HUGO 2014*).

**Disclaimer** The sponsors have no role in the study design and conduct; the collection, management, analysis and interpretation of the data; or the preparation and approval of the manuscript.

**Competing interests** E-LH reports lecture fees and travel expenses for lectures given at academic meetings from GE Healthcare, Sedana Medical, Smiths Medical, Air Liquide Medical Systems. ELH and FL are the inventors of the FreeO<sub>2</sub> device and founded Oxynov Inc. to develop the commercial device. The firm Oxynov Inc. provides the automated oxygen therapy equipment to all the participating centers but has no other involvement in the study.

**Patient consent** Obtained.

**Ethics approval** The Institutional Review Board of the University Hospital of Brest (France) approved the trial for all French centers (IDRCB RB14-060). The institutional review board from the Québec Heart and Lung Institute (Canada) approved the trial for their own center.. Any protocol modification will be submitted for review and approval by the ethics committee. The FreeO<sub>2</sub> Post-Op study is conducted in accordance with the declaration of Helsinki and was registered on September 11, 2015 at <http://www.clinicaltrials.gov> with trial identification number NCT02546830. First patient inclusion was performed on January 14<sup>th</sup> of 2016.

**Provenance and peer review** Not commissioned; externally peer reviewed.



## Figures Legends

### Figure 1: Participant timeline of the FreeO<sub>2</sub> PostOp study

Inclusion is performed during the anesthesia consultation, prior to a scheduled major surgery ( $\geq 2$ -hours duration; ARISCAT score  $\geq 26$ ). Eligibility criteria are verified and the patient needs to sign the informed consent. Randomization is performed no later than 1-hour following extubation in the recovery room. Clinical data will be recorded each hour during the first 3-hours of care and twice daily for up to 3-days. Continuous SpO<sub>2</sub> recording will be performed in each randomization groups for up to 3-days. Outcome parameters will be assessed at day 28.

*LOS: length-of-stay (days); SpO<sub>2</sub>: pulse oximetry (%).*

### Figure 2: Consort diagram of the FreeO<sub>2</sub> PostOp study

Randomization will be performed after verification of the eligibility criteria and it will be stratified according to the presence of a medical history of COPD. For non-COPD patients the target will be a SpO<sub>2</sub> range = 92-96%; for COPD patients the target will be a SpO<sub>2</sub> range = 88-92%.

Patients will be assigned either to standard continuous O<sub>2</sub> administration (*Standard*: manual adjustment), or automated closed-loop O<sub>2</sub> administration (*FreeO<sub>2</sub>*: automated adjustment, up to each second); in both groups, continuous SpO<sub>2</sub> recordings will be performed during up to 3 days according to the FreeO<sub>2</sub> system.

*SpO<sub>2</sub>: pulse oximetry (%).*

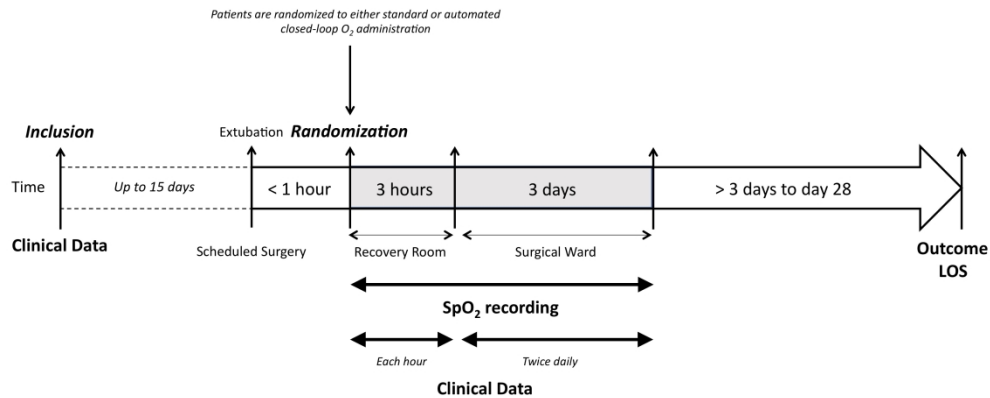

Figure 1: Participant timeline of the FreeO2 PostOp study

Inclusion is performed during the anesthesia consultation, prior to a scheduled major surgery ( $\geq 2$ -hours duration; ARISCAT score  $\geq 26$ ). Eligibility criteria are verified and the patient needs to sign the informed consent. Randomization is performed no later than 1-hour following extubation in the recovery room. Clinical data will be recorded each hour during the first 3-hours of care and twice daily for up to 3-days. Continuous SpO<sub>2</sub> recording will be performed in each randomization groups for up to 3-days. Outcome parameters will be assessed at day 28.

LOS: length-of-stay (days); SpO<sub>2</sub>: pulse oximetry (%).

1410x793mm (72 x 72 DPI)

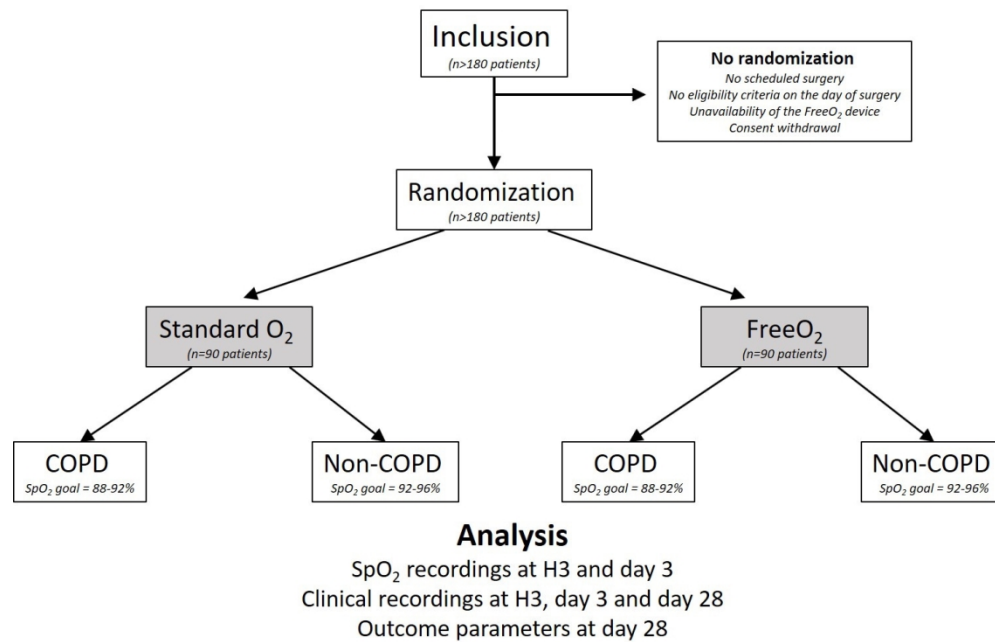

28 Figure 2: Consort diagram of the FreeO2 PostOp study

29 Randomization will be performed after verification of the eligibility criteria and it will be stratified according  
30 to the presence of a medical history of COPD. For non-COPD patients the target will be a SpO<sub>2</sub> range = 92-  
31 96%; for COPD patients the target will be a SpO<sub>2</sub> range = 88-92%.

32 Patients will be assigned either to standard continuous O<sub>2</sub> administration (Standard: manual adjustment), or  
33 automated closed-loop O<sub>2</sub> administration (FreeO<sub>2</sub>: automated adjustment, up to each second); in both  
34 groups, continuous SpO<sub>2</sub> recordings will be performed during up to 3 days according to the FreeO<sub>2</sub> system.  
35 SpO<sub>2</sub>: pulse oximetry (%).

36 128x83mm (300 x 300 DPI)

## FreeO2 PostOp trial

**SPIRIT 2013 Checklist**

| Section/item                                              | Item n°                                                                               | Pages       |
|-----------------------------------------------------------|---------------------------------------------------------------------------------------|-------------|
| <b>Administrative information</b>                         |                                                                                       |             |
| Title                                                     | 1                                                                                     | 1           |
| Trial registration                                        | 2                                                                                     | 2 and 6     |
| Protocol version                                          | 3                                                                                     |             |
| Funding                                                   | 4                                                                                     | 13          |
| Roles and responsibilities                                | 5a Protocol contributors                                                              | 6,13        |
|                                                           | 5b Trial sponsor                                                                      | 13,25       |
|                                                           | 5c Role of sponsor and funders                                                        | 13          |
|                                                           | 5d composition, roles, responsibilities of the different coordinators, committees ... | 10,11,12,13 |
| <b>Introduction</b>                                       |                                                                                       |             |
| Background and rationale                                  | 6a description of research question                                                   | 4,5         |
|                                                           | 6b explanation for choice of comparators                                              | 5           |
| Objectives                                                | 7                                                                                     | 5           |
| Trial design                                              | 8                                                                                     | 5           |
| <b>Methods : participants, interventions and outcomes</b> |                                                                                       |             |
| Study setting                                             | 9                                                                                     | 6           |
| Eligibility criteria                                      | 10                                                                                    | 6           |
| Interventions                                             | 11a interventions for each group                                                      | 7,8         |
|                                                           | 11b criteria for discontinuing or modifying allocated interventions                   | 7           |
|                                                           | 11c strategies to improve adherence to intervention protocols                         | 7           |
|                                                           | 11d relevant concomitant care and interventions                                       | 8           |
| Outcomes                                                  | 12                                                                                    | 8,9         |
| Participant timeline                                      | 13                                                                                    | 9, Fig 1    |
| Sample size                                               | 14                                                                                    | 9           |
| Recruitment                                               | 15                                                                                    | 6,7         |
| <b>Methods : assignment of interventions</b>              |                                                                                       |             |

|                                                            |                                                                                                                             |       |
|------------------------------------------------------------|-----------------------------------------------------------------------------------------------------------------------------|-------|
| <b>Allocation</b>                                          |                                                                                                                             |       |
| Sequence generation                                        | 16a method of generating the allocation sequence                                                                            | 9     |
| Allocation concealment mechanism                           | 16b Randomization method                                                                                                    | 9     |
| Implementation                                             | 16c Who will generate allocation sequence, enroll participants, assign participants to interventions                        | 9     |
| Blinding                                                   | 17a Who will be blinded to interventions                                                                                    | 9     |
|                                                            | 17b If blinded, circumstances for unblinding                                                                                | NA    |
| <b>Methods : data collection, management, and analysis</b> |                                                                                                                             |       |
| Data collection methods                                    | 18a plans for assessment and collection of outcome and other data                                                           | 10    |
|                                                            | 18b plans to promote participants retention and complete follow-up                                                          | NA    |
| Data management                                            | 19                                                                                                                          | 10    |
| Statistical methods                                        | 20a statistical methods for primary and secondary outcomes analysis                                                         | 10,11 |
|                                                            | 20b methods for additional analysis                                                                                         | 10,11 |
|                                                            | 20c definition of analysis population relating to protocol non-adherence and any statistical methods to handle missing data | 11    |
| <b>Methods : monitoring</b>                                |                                                                                                                             |       |
| Data monitoring                                            | 21a composition of data monitoring committee                                                                                | 11,12 |
|                                                            | 21b description of any interim analyses and stopping guidelines                                                             | NA    |
| Harms                                                      | 22                                                                                                                          | 11    |
| Auditing                                                   | 23                                                                                                                          | 12    |
| <b>Ethics and dissemination</b>                            |                                                                                                                             |       |
| Research ethics approval                                   | 24                                                                                                                          | 12,25 |
| Protocol amendments                                        | 25 plans for communicating important modifications to relevant parties                                                      | 12    |
| Consent or assent                                          | 26a who will obtain informed consent of assent and how                                                                      | 12    |
|                                                            | 26b additional consent provisions for collections ... if applicable                                                         | NA    |

|                               |                                                                                                                                   |            |
|-------------------------------|-----------------------------------------------------------------------------------------------------------------------------------|------------|
| Confidentiality               | 27                                                                                                                                | 12         |
| Declaration of interests      | 28                                                                                                                                | 13,25      |
| Access to data                | 29                                                                                                                                | 13         |
| Ancillary and post-trial care | 30 provisions, if any, for ancillary and post-trial care, and for compensation for those who suffer harm from trial participation | NA         |
| Dissemination policy          | 31a plans to communicate trial results                                                                                            | 13         |
|                               | 31b authorship eligibility guidelines                                                                                             | 13         |
|                               | 31c plans, if any, for granting public access to full protocol ...                                                                | 12         |
| <b>Appendices</b>             |                                                                                                                                   |            |
| Informed consent materials    | 32                                                                                                                                | Appendix 1 |
| Biological specimens          | 33                                                                                                                                | NA         |
